# Supplementary material for: Identification of Tomato Infecting Viruses That Co-Isolate with Nanovesicles Using a Combined Proteomics and Electron-Microscopic Approach
Source: MDPI journal article supplement (doi:10.3390/nano11081922), 2021-07-26

| Row | Accession  | Protein                                                                                |
|-----|------------|----------------------------------------------------------------------------------------|
| 1   | P38416     | Linoleate 9S-lipoxygenase B OS=Solanum lycopersicum GN=LOX1.2 PE=2 SV=1                |
| 2   | O55648     | Nucleoprotein OS=Tomato spotted wilt virus PE=2 SV=1                                   |
| 3   | K4CWE4     | Uncharacterized protein OS=Solanum lycopersicum PE=3 SV=1                              |
| 4   | V5M1X4     | Nucleoprotein OS=Tomato spotted wilt virus GN=N PE=3 SV=1                              |
| 5   | V5M0P0     | Nucleoprotein OS=Tomato spotted wilt virus GN=N PE=3 SV=1                              |
| 6   | Q65XZ3     | Nucleoprotein OS=Tomato spotted wilt virus GN=N PE=3 SV=1                              |
| 7   | K4C227     | Uncharacterized protein OS=Solanum lycopersicum PE=3 SV=1                              |
| 8   | K4D8S6     | Uncharacterized protein OS=Solanum lycopersicum PE=4 SV=1                              |
| 9   | K4BVN6     | Uncharacterized protein OS=Solanum lycopersicum PE=3 SV=1                              |
| 10  | K4BEL1     | Uncharacterized protein OS=Solanum lycopersicum PE=3 SV=1                              |
| 11  | K4AV63     | Uncharacterized protein OS=Solanum lycopersicum PE=3 SV=1                              |
| 12  | K4DAD5     | Uncharacterized protein OS=Solanum lycopersicum PE=3 SV=1                              |
| 13  | K4C4Z6     | Uncharacterized protein OS=Solanum lycopersicum PE=3 SV=1                              |
| 14  | A0A0N9H8W3 | Nucleocapsid protein (Fragment) OS=Tomato spotted wilt virus PE=4 SV=1                 |
| 15  | Q0PTG1     | Nucleoprotein OS=Tomato spotted wilt virus GN=N PE=3 SV=1                              |
| 16  | P14280     | Pectinesterase 1 OS=Solanum lycopersicum GN=PME1.9 PE=1 SV=5                           |
| 17  | P28032     | Alcohol dehydrogenase 2 OS=Solanum lycopersicum GN=ADH2 PE=2 SV=2                      |
| 18  | K4BL25     | Uncharacterized protein OS=Solanum lycopersicum PE=3 SV=1                              |
| 19  | Q2VI27     | Nucleocapsid protein (Fragment) OS=Tomato spotted wilt virus PE=4 SV=1                 |
| 20  | P18247     | Genome polyprotein OS=Potato virus Y (strain N) PE=3 SV=2                              |
| 21  | Q53Z32     | Molecular chaperone Hsp90-2 OS=Solanum lycopersicum PE=2 SV=1                          |
| 22  | Q6UJX4     | Molecular chaperone Hsp90-1 OS=Solanum lycopersicum PE=2 SV=1                          |
| 23  | K4CEJ1     | Uncharacterized protein OS=Solanum lycopersicum PE=4 SV=1                              |
| 24  | E3NYV4     | Polyprotein OS=Potato virus Y (strain C) PE=3 SV=1                                     |
| 25  | K4CSI2     | Uncharacterized protein OS=Solanum lycopersicum PE=3 SV=1                              |
| 26  | A0A0C5CHE6 | Ribulose biphosphate carboxylase large chain OS=Solanum lycopersicum GN=rbcL PE=3 SV=1 |
| 27  | K4CQV5     | Fructose-bisphosphate aldolase OS=Solanum lycopersicum PE=3 SV=1                       |
| 28  | Q8VXF8     | Phosphoenolpyruvate carboxylase 2 OS=Solanum lycopersicum GN=ppc2 PE=3 SV=1            |
| 29  | Q4LDR0     | Heat shock protein OS=Solanum lycopersicum GN=Lehsp100/ClpB PE=2 SV=1                  |
| 30  | K4DFR1     | Uncharacterized protein OS=Solanum lycopersicum PE=3 SV=1                              |
| 31  | K4BP30     | Pyruvate kinase OS=Solanum lycopersicum PE=3 SV=1                                      |
| 32  | K4BJW4     | Glyceraldehyde-3-phosphate dehydrogenase OS=Solanum lycopersicum PE=3 SV=1             |
| 33  | P38415     | Linoleate 9S-lipoxygenase A OS=Solanum lycopersicum GN=LOX1.1 PE=2 SV=1                |
| 34  | P10967     | 1-aminocyclopropane-1-carboxylate oxidase homolog OS=Solanum lycopersicum GN=          |
| 35  | K4BYG6     | Glyceraldehyde-3-phosphate dehydrogenase OS=Solanum lycopersicum PE=3 SV=1             |
| 36  | K4D3J1     | Uncharacterized protein OS=Solanum lycopersicum PE=4 SV=1                              |
| 37  | K4DCW0     | Uncharacterized protein OS=Solanum lycopersicum PE=3 SV=1                              |
| 38  | Q9FT17     | Lipoxygenase OS=Solanum lycopersicum PE=2 SV=1                                         |
| 39  | K4AXU0     | Uncharacterized protein OS=Solanum lycopersicum PE=4 SV=1                              |
| 40  | V5YN05     | Plasmamembrane intrinsic protein 15 OS=Solanum lycopersicum GN=PIP1;5 PE=2 SV=         |
| 41  | K4D3E4     | Fructose-bisphosphate aldolase OS=Solanum lycopersicum PE=3 SV=1                       |
| 42  | K4BX20     | ATP synthase subunit beta OS=Solanum lycopersicum PE=3 SV=1                            |
| 43  | K4BNR2     | ATP synthase subunit beta OS=Solanum lycopersicum PE=3 SV=1                            |
| 44  | K4CG46     | Uncharacterized protein OS=Solanum lycopersicum PE=3 SV=1                              |
| 45  | K4DCQ4     | Uncharacterized protein OS=Solanum lycopersicum PE=4 SV=1                              |
| 46  | Q4W5U7     | Calnexin-like protein OS=Solanum lycopersicum GN=LeCNX61.0 PE=2 SV=1                   |
| 47  | P93767     | ADP/ATP translocator OS=Solanum lycopersicum PE=2 SV=1                                 |
| 48  | Q42876     | Leucine aminopeptidase 2, chloroplastic OS=Solanum lycopersicum GN=LAPA2 PE=2 S        |

|    |            |                                                                                       |
|----|------------|---------------------------------------------------------------------------------------|
| 49 | K4C9L4     | Uncharacterized protein OS=Solanum lycopersicum PE=4 SV=1                             |
| 50 | K4CL75     | Uncharacterized protein OS=Solanum lycopersicum PE=4 SV=1                             |
| 51 | K4BDY2     | Uncharacterized protein OS=Solanum lycopersicum PE=4 SV=1                             |
| 52 | Q96575     | Pectinesterase 2.2 OS=Solanum lycopersicum GN=PME2.2 PE=3 SV=1                        |
| 53 | Q5XP36     | Glycoprotein OS=Tomato spotted wilt virus PE=4 SV=1                                   |
| 54 | K4D4E6     | Uncharacterized protein OS=Solanum lycopersicum PE=3 SV=1                             |
| 55 | K4BHR9     | Uncharacterized protein OS=Solanum lycopersicum PE=3 SV=1                             |
| 56 | H1ZXA9     | Heat shock protein 70 isoform 3 OS=Solanum lycopersicum GN=hsc70.3 PE=2 SV=1          |
| 57 | K4D3F8     | Pyruvate kinase OS=Solanum lycopersicum PE=3 SV=1                                     |
| 58 | K4BUC5     | Uncharacterized protein OS=Solanum lycopersicum PE=3 SV=1                             |
| 59 | K4CWR4     | Adenosylhomocysteinase OS=Solanum lycopersicum PE=3 SV=1                              |
| 60 | K4C8R4     | Glyceraldehyde-3-phosphate dehydrogenase OS=Solanum lycopersicum PE=3 SV=1            |
| 61 | K7SGP9     | Carboxylesterase 1 OS=Solanum lycopersicum GN=CXE1 PE=4 SV=1                          |
| 62 | K4CUP0     | Uncharacterized protein OS=Solanum lycopersicum PE=4 SV=1                             |
| 63 | K4ASM0     | Lipoxygenase OS=Solanum lycopersicum PE=3 SV=1                                        |
| 64 | K4DA99     | Uncharacterized protein OS=Solanum lycopersicum PE=3 SV=1                             |
| 65 | K4CF87     | Uncharacterized protein OS=Solanum lycopersicum PE=3 SV=1                             |
| 66 | K4BPK3     | Uncharacterized protein OS=Solanum lycopersicum PE=3 SV=1                             |
| 67 | Q0ZPA3     | Plastid lipid associated protein CHRC OS=Solanum lycopersicum GN=ChrC PE=2 SV=1       |
| 68 | K4D422     | Uncharacterized protein OS=Solanum lycopersicum PE=4 SV=1                             |
| 69 | K4DBC4     | Aconitate hydratase OS=Solanum lycopersicum PE=3 SV=1                                 |
| 70 | P30221     | 17.8 kDa class I heat shock protein OS=Solanum lycopersicum PE=2 SV=1                 |
| 71 | Q9SYV0     | 17.6 kD class I small heat shock protein OS=Solanum lycopersicum GN=HSP17.6 PE=2 SV=1 |
| 72 | V5YN09     | Plasmamembrane intrinsic protein 26 OS=Solanum lycopersicum GN=PIP2;6 PE=2 SV=1       |
| 73 | K4D9L9     | Uncharacterized protein OS=Solanum lycopersicum PE=3 SV=1                             |
| 74 | D5L5R0     | Acid invertase OS=Solanum lycopersicum var. cerasiforme GN=TAI PE=2 SV=1              |
| 75 | K4B249     | Uncharacterized protein OS=Solanum lycopersicum PE=3 SV=1                             |
| 76 | K4CFS8     | Uncharacterized protein OS=Solanum lycopersicum PE=3 SV=1                             |
| 77 | K4BJY1     | Uncharacterized protein OS=Solanum lycopersicum PE=3 SV=1                             |
| 78 | K4CUT2     | Uncharacterized protein OS=Solanum lycopersicum PE=3 SV=1                             |
| 79 | K4CR90     | Uncharacterized protein OS=Solanum lycopersicum PE=3 SV=1                             |
| 80 | K4D9L5     | Uncharacterized protein OS=Solanum lycopersicum PE=3 SV=1                             |
| 81 | P30264     | Catalase isozyme 1 OS=Solanum lycopersicum GN=CAT1 PE=2 SV=1                          |
| 82 | K4BUD9     | Tubulin alpha chain OS=Solanum lycopersicum PE=3 SV=1                                 |
| 83 | K4B433     | Uncharacterized protein OS=Solanum lycopersicum PE=4 SV=1                             |
| 84 | A0A0C5CHA6 | ATP synthase subunit alpha, chloroplastic OS=Solanum lycopersicum GN=atpA PE=3 SV=1   |
| 85 | K4C1T2     | Clathrin heavy chain OS=Solanum lycopersicum PE=3 SV=1                                |
| 86 | K4CFR0     | Uncharacterized protein OS=Solanum lycopersicum PE=4 SV=1                             |
| 87 | K4D338     | Uncharacterized protein OS=Solanum lycopersicum PE=3 SV=1                             |
| 88 | Q96576     | Pectinesterase 3 OS=Solanum lycopersicum GN=PME3 PE=3 SV=1                            |
| 89 | K4CLK1     | Uncharacterized protein OS=Solanum lycopersicum PE=3 SV=1                             |
| 90 | K4B166     | Uncharacterized protein OS=Solanum lycopersicum PE=3 SV=1                             |
| 91 | P05117     | Polygalacturonase-2 OS=Solanum lycopersicum GN=PG2 PE=1 SV=1                          |
| 92 | K4D2X7     | Uncharacterized protein OS=Solanum lycopersicum PE=3 SV=1                             |
| 93 | K4CX43     | Uncharacterized protein OS=Solanum lycopersicum PE=4 SV=1                             |
| 94 | K4DH73     | Uncharacterized protein OS=Solanum lycopersicum PE=3 SV=1                             |
| 95 | Q6QLX4     | Alcohol acyl transferase OS=Solanum lycopersicum GN=AAT1 PE=2 SV=1                    |
| 96 | K4B6D8     | Uncharacterized protein OS=Solanum lycopersicum PE=3 SV=1                             |
| 97 | K4BXN9     | Uncharacterized protein OS=Solanum lycopersicum PE=3 SV=1                             |

|     |        |                                                                                     |
|-----|--------|-------------------------------------------------------------------------------------|
| 98  | K4CKY5 | Uncharacterized protein OS=Solanum lycopersicum PE=3 SV=1                           |
| 99  | K4D6V7 | Uncharacterized protein OS=Solanum lycopersicum PE=3 SV=1                           |
| 100 | K4DF99 | Uncharacterized protein OS=Solanum lycopersicum PE=3 SV=1                           |
| 101 | E1Y5V2 | NSs non-structural protein OS=Tomato spotted wilt virus GN=NSs PE=4 SV=1            |
| 102 | K4B0D9 | Uncharacterized protein OS=Solanum lycopersicum PE=4 SV=1                           |
| 103 | Q8S4R4 | Prolycopene isomerase, chloroplastic OS=Solanum lycopersicum GN=CRTISO PE=1 SV=     |
| 104 | K4ASU4 | Uncharacterized protein OS=Solanum lycopersicum PE=3 SV=1                           |
| 105 | E0XN34 | Alpha-mannosidase OS=Solanum lycopersicum PE=2 SV=1                                 |
| 106 | K4B438 | Uncharacterized protein OS=Solanum lycopersicum PE=3 SV=1                           |
| 107 | G5DGD2 | Class I small heat shock protein 20.1 OS=Solanum lycopersicum GN=Sl20.1shsp PE=3 S  |
| 108 | Q38JD4 | Temperature-induced lipocalin OS=Solanum lycopersicum GN=TIL PE=2 SV=1              |
| 109 | K4CW41 | Uncharacterized protein OS=Solanum lycopersicum PE=4 SV=1                           |
| 110 | K4B3M5 | V-type proton ATPase subunit a OS=Solanum lycopersicum PE=3 SV=1                    |
| 111 | K4CBP9 | Uncharacterized protein OS=Solanum lycopersicum PE=4 SV=1                           |
| 112 | K4B1M2 | Uncharacterized protein OS=Solanum lycopersicum PE=3 SV=1                           |
| 113 | K4CJ46 | Isopropylmalate synthase OS=Solanum lycopersicum GN=IPMS2 PE=2 SV=1                 |
| 114 | K4BI68 | Uncharacterized protein OS=Solanum lycopersicum PE=3 SV=1                           |
| 115 | K4B6W4 | Uncharacterized protein OS=Solanum lycopersicum PE=3 SV=1                           |
| 116 | P17786 | Elongation factor 1-alpha OS=Solanum lycopersicum PE=2 SV=1                         |
| 117 | P93207 | 14-3-3 protein 10 OS=Solanum lycopersicum GN=TFT10 PE=2 SV=2                        |
| 118 | Q6SKP4 | Ribosomal protein L3 OS=Solanum lycopersicum GN=RPL3 PE=2 SV=1                      |
| 119 | K4BS97 | Uncharacterized protein OS=Solanum lycopersicum PE=4 SV=1                           |
| 120 | K4BPR4 | Uncharacterized protein OS=Solanum lycopersicum PE=3 SV=1                           |
| 121 | K4CFD4 | Aconitate hydratase OS=Solanum lycopersicum PE=3 SV=1                               |
| 122 | K4C2D6 | 60S acidic ribosomal protein P0 OS=Solanum lycopersicum PE=3 SV=1                   |
| 123 | G5DGD4 | Class I small heat shock protein OS=Solanum lycopersicum GN=Sl20.0shsp PE=3 SV=1    |
| 124 | K4B6D4 | Uncharacterized protein OS=Solanum lycopersicum PE=3 SV=1                           |
| 125 | K4BW50 | Uncharacterized protein OS=Solanum lycopersicum PE=3 SV=1                           |
| 126 | K4CNL0 | Uncharacterized protein OS=Solanum lycopersicum PE=4 SV=1                           |
| 127 | G8D593 | Ribulose biphosphate carboxylase large chain (Fragment) OS=Solanum lycopersicum     |
| 128 | K4BP59 | Glyceraldehyde-3-phosphate dehydrogenase OS=Solanum lycopersicum PE=3 SV=1          |
| 129 | K4C2U0 | Proteasome subunit beta type OS=Solanum lycopersicum PE=3 SV=1                      |
| 130 | K4C5S4 | Clathrin heavy chain OS=Solanum lycopersicum PE=3 SV=1                              |
| 131 | P08706 | Ribulose biphosphate carboxylase small chain 1, chloroplastic OS=Solanum lycopersic |
| 132 | K4C455 | Uncharacterized protein OS=Solanum lycopersicum PE=4 SV=1                           |
| 133 | K4D7F1 | Uncharacterized protein OS=Solanum lycopersicum PE=4 SV=1                           |
| 134 | K4AVB7 | Uncharacterized protein OS=Solanum lycopersicum PE=4 SV=1                           |
| 135 | K4DC02 | Proteasome subunit alpha type OS=Solanum lycopersicum PE=3 SV=1                     |
| 136 | K4B9T4 | Lactoylglutathione lyase OS=Solanum lycopersicum PE=3 SV=1                          |
| 137 | K4C4W6 | Tubulin beta chain OS=Solanum lycopersicum PE=3 SV=1                                |
| 138 | K4BRG8 | Uncharacterized protein OS=Solanum lycopersicum PE=3 SV=1                           |
| 139 | K4BVD8 | Proteasome subunit alpha type OS=Solanum lycopersicum PE=3 SV=1                     |
| 140 | K4DB46 | Uncharacterized protein OS=Solanum lycopersicum PE=4 SV=1                           |
| 141 | Q42887 | Enolase (Fragment) OS=Solanum lycopersicum PE=4 SV=1                                |
| 142 | K4B3G5 | Uncharacterized protein OS=Solanum lycopersicum PE=4 SV=1                           |
| 143 | O04936 | Malic enzyme OS=Solanum lycopersicum GN=LeME2 PE=2 SV=1                             |
| 144 | O24024 | Plastid-lipid-Associated Protein (Fragment) OS=Solanum lycopersicum GN=pap PE=4 S   |
| 145 | K4CBF0 | Acetyltransferase component of pyruvate dehydrogenase complex OS=Solanum lycop      |
| 146 | K4BJJ6 | Uncharacterized protein OS=Solanum lycopersicum PE=4 SV=1                           |

|     |            |                                                                                                          |
|-----|------------|----------------------------------------------------------------------------------------------------------|
| 147 | K4D5U3     | Glutamine synthetase OS=Solanum lycopersicum PE=3 SV=1                                                   |
| 148 | K4BJK7     | 40S ribosomal protein S3a OS=Solanum lycopersicum PE=3 SV=1                                              |
| 149 | K4C745     | Uncharacterized protein OS=Solanum lycopersicum PE=3 SV=1                                                |
| 150 | O65004     | Farnesyl pyrophosphate synthase OS=Solanum lycopersicum GN=FPS1 PE=2 SV=1                                |
| 151 | E3VWN6     | 1-aminocyclopropane-1-carboxylic acid oxidase OS=Solanum lycopersicum GN=ACO1                            |
| 152 | K4C8W9     | 40S ribosomal protein S3a OS=Solanum lycopersicum PE=3 SV=1                                              |
| 153 | K4CME9     | Uncharacterized protein OS=Solanum lycopersicum PE=4 SV=1                                                |
| 154 | K4BW14     | Pyrophosphate--fructose 6-phosphate 1-phosphotransferase subunit alpha OS=Solanum lycopersicum PE=3 SV=1 |
| 155 | K4CQB5     | Uncharacterized protein OS=Solanum lycopersicum PE=4 SV=1                                                |
| 156 | K4C9J5     | Histone H2B OS=Solanum lycopersicum PE=3 SV=1                                                            |
| 157 | K4C3D8     | 40S ribosomal protein S8 OS=Solanum lycopersicum PE=3 SV=1                                               |
| 158 | K4BA40     | Proteasome subunit alpha type OS=Solanum lycopersicum PE=3 SV=1                                          |
| 159 | K4DBV1     | Uncharacterized protein OS=Solanum lycopersicum PE=3 SV=1                                                |
| 160 | K4BY24     | Uncharacterized protein OS=Solanum lycopersicum PE=4 SV=1                                                |
| 161 | P05349     | Ribulose biphosphate carboxylase small chain 3B, chloroplastic OS=Solanum lycopersicum PE=3 SV=1         |
| 162 | Q40140     | Aspartic protease OS=Solanum lycopersicum PE=2 SV=1                                                      |
| 163 | K4B4U4     | Glyceraldehyde-3-phosphate dehydrogenase OS=Solanum lycopersicum PE=3 SV=1                               |
| 164 | K4BRF6     | Uncharacterized protein OS=Solanum lycopersicum PE=4 SV=1                                                |
| 165 | K4BL13     | Uncharacterized protein OS=Solanum lycopersicum PE=3 SV=1                                                |
| 166 | K4BVZ0     | Glyceraldehyde-3-phosphate dehydrogenase OS=Solanum lycopersicum PE=3 SV=1                               |
| 167 | K4CE04     | Uncharacterized protein OS=Solanum lycopersicum PE=3 SV=1                                                |
| 168 | K4AYJ8     | Uncharacterized protein OS=Solanum lycopersicum PE=3 SV=1                                                |
| 169 | K4D245     | Proteasome subunit alpha type OS=Solanum lycopersicum PE=3 SV=1                                          |
| 170 | P93214     | 14-3-3 protein 9 OS=Solanum lycopersicum GN=TFT9 PE=2 SV=2                                               |
| 171 | K4BPW4     | Uncharacterized protein OS=Solanum lycopersicum PE=4 SV=1                                                |
| 172 | K4BNE0     | Uncharacterized protein OS=Solanum lycopersicum PE=4 SV=1                                                |
| 173 | K4CLS9     | Uncharacterized protein OS=Solanum lycopersicum PE=4 SV=1                                                |
| 174 | K4B8V1     | Uncharacterized protein OS=Solanum lycopersicum PE=3 SV=1                                                |
| 175 | A0A0K2K0B0 | Putative coat protein OS=Southern tomato virus PE=4 SV=1                                                 |
| 176 | K4D384     | Uncharacterized protein OS=Solanum lycopersicum PE=4 SV=1                                                |
| 177 | K4BWQ1     | Uncharacterized protein OS=Solanum lycopersicum PE=3 SV=1                                                |
| 178 | K4C245     | Uncharacterized protein OS=Solanum lycopersicum PE=4 SV=1                                                |
| 179 | K4D1Z3     | Uncharacterized protein OS=Solanum lycopersicum PE=3 SV=1                                                |
| 180 | K4B2T0     | Uncharacterized protein OS=Solanum lycopersicum PE=4 SV=1                                                |
| 181 | K4B1F9     | Uncharacterized protein OS=Solanum lycopersicum PE=4 SV=1                                                |
| 182 | B0JEU3     | Uncharacterized protein OS=Solanum lycopersicum GN=vicilin PE=4 SV=1                                     |
| 183 | K4CVM9     | 40S ribosomal protein S3a OS=Solanum lycopersicum PE=3 SV=1                                              |
| 184 | P93212     | 14-3-3 protein 7 OS=Solanum lycopersicum GN=TFT7 PE=2 SV=2                                               |
| 185 | K4DH49     | Pyrophosphate--fructose 6-phosphate 1-phosphotransferase subunit alpha OS=Solanum lycopersicum PE=3 SV=1 |
| 186 | K4DHC8     | Uncharacterized protein OS=Solanum lycopersicum PE=4 SV=1                                                |
| 187 | K4D5K8     | Uncharacterized protein OS=Solanum lycopersicum PE=3 SV=1                                                |
| 188 | Q6E4P4     | Carotenoid cleavage dioxygenase 1B OS=Solanum lycopersicum GN=CCD1B PE=2 SV=2                            |
| 189 | Q95661     | Small heat shock protein, chloroplastic OS=Solanum lycopersicum GN=HSP21 PE=2 SV=2                       |
| 190 | K4B858     | Uncharacterized protein OS=Solanum lycopersicum PE=4 SV=1                                                |
| 191 | K4C9Z6     | Uncharacterized protein OS=Solanum lycopersicum PE=4 SV=1                                                |
| 192 | Q40129     | Uncharacterized protein OS=Solanum lycopersicum PE=2 SV=1                                                |
| 193 | K4CXD9     | 40S ribosomal protein S8 OS=Solanum lycopersicum PE=3 SV=1                                               |
| 194 | P35057     | Histone H4 OS=Solanum lycopersicum PE=3 SV=2                                                             |
| 195 | Q38JE1     | Temperature-induced lipocalin OS=Solanum lycopersicum GN=TIL' PE=2 SV=1                                  |

|     |            |                                                                                    |
|-----|------------|------------------------------------------------------------------------------------|
| 196 | K4BKP5     | Uncharacterized protein OS=Solanum lycopersicum PE=3 SV=1                          |
| 197 | K4CAH3     | 40S ribosomal protein S8 OS=Solanum lycopersicum PE=3 SV=1                         |
| 198 | K4C261     | Serine hydroxymethyltransferase OS=Solanum lycopersicum PE=3 SV=1                  |
| 199 | Q96489     | Class II small heat shock protein Le-HSP17.6 OS=Solanum lycopersicum PE=2 SV=2     |
| 200 | K4CNI4     | Uncharacterized protein OS=Solanum lycopersicum PE=4 SV=1                          |
| 201 | K4BN29     | Uncharacterized protein OS=Solanum lycopersicum PE=3 SV=1                          |
| 202 | K4BMN4     | Uncharacterized protein OS=Solanum lycopersicum PE=3 SV=1                          |
| 203 | K4CGH5     | Uncharacterized protein OS=Solanum lycopersicum PE=4 SV=1                          |
| 204 | K4B816     | 40S ribosomal protein S4 OS=Solanum lycopersicum PE=3 SV=1                         |
| 205 | K4CEY5     | Uncharacterized protein OS=Solanum lycopersicum PE=3 SV=1                          |
| 206 | K4CEY6     | Uncharacterized protein OS=Solanum lycopersicum PE=4 SV=1                          |
| 207 | K4BZB1     | Uncharacterized protein OS=Solanum lycopersicum PE=3 SV=1                          |
| 208 | K4CHJ1     | Uncharacterized protein OS=Solanum lycopersicum PE=4 SV=1                          |
| 209 | A0A097PIF5 | Tomato spotted wilt virus isolate p331 putative movement protein protein (Fragment |
| 210 | K4CBD6     | Xylose isomerase OS=Solanum lycopersicum PE=3 SV=1                                 |
| 211 | K4C950     | Uncharacterized protein OS=Solanum lycopersicum PE=4 SV=1                          |
| 212 | K4CX88     | Uncharacterized protein OS=Solanum lycopersicum PE=4 SV=1                          |
| 213 | K4DH95     | Uncharacterized protein OS=Solanum lycopersicum PE=4 SV=1                          |
| 214 | K4CR64     | Uncharacterized protein OS=Solanum lycopersicum PE=4 SV=1                          |
| 215 | P37222     | NADP-dependent malic enzyme, chloroplastic (Fragment) OS=Solanum lycopersicum f    |
| 216 | K4B3K7     | Uncharacterized protein OS=Solanum lycopersicum PE=3 SV=1                          |
| 217 | K4CRX6     | Uncharacterized protein OS=Solanum lycopersicum PE=3 SV=1                          |
| 218 | K4DHE3     | Uncharacterized protein OS=Solanum lycopersicum PE=4 SV=1                          |
| 219 | K4CCD7     | Proteasome subunit beta type OS=Solanum lycopersicum PE=3 SV=1                     |
| 220 | K4DCU3     | Uncharacterized protein OS=Solanum lycopersicum PE=4 SV=1                          |
| 221 | K4B110     | Uncharacterized protein OS=Solanum lycopersicum PE=3 SV=1                          |
| 222 | K4B5N6     | Uncharacterized protein OS=Solanum lycopersicum PE=4 SV=1                          |
| 223 | K4D6Y5     | Uncharacterized protein OS=Solanum lycopersicum PE=3 SV=1                          |
| 224 | K4CH96     | Uncharacterized protein OS=Solanum lycopersicum PE=4 SV=1                          |
| 225 | K4BBC4     | Plastidic glucose transporter 1 OS=Solanum lycopersicum GN=pGlcT1 PE=2 SV=1        |
| 226 | K4B276     | Uncharacterized protein OS=Solanum lycopersicum PE=3 SV=1                          |
| 227 | K4AZL0     | Plasmamembrane intrinsic protein 12 OS=Solanum lycopersicum GN=PIP1;2 PE=2 SV=     |
| 228 | K4AYV8     | Uncharacterized protein OS=Solanum lycopersicum PE=4 SV=1                          |
| 229 | K4D5F9     | Uncharacterized protein OS=Solanum lycopersicum PE=4 SV=1                          |
| 230 | P54773     | Photosystem II 22 kDa protein, chloroplastic OS=Solanum lycopersicum GN=PSBS PE=   |
| 231 | K4BYQ5     | Uncharacterized protein OS=Solanum lycopersicum PE=4 SV=1                          |
| 232 | K4BVH7     | Coatomer subunit alpha OS=Solanum lycopersicum PE=4 SV=1                           |
| 233 | K4CD10     | Uncharacterized protein OS=Solanum lycopersicum PE=4 SV=1                          |
| 234 | K4D2W1     | Uncharacterized protein OS=Solanum lycopersicum PE=3 SV=1                          |
| 235 | P42652     | 14-3-3 protein 4 OS=Solanum lycopersicum GN=TFT4 PE=2 SV=1                         |
| 236 | K4CWK1     | Uncharacterized protein OS=Solanum lycopersicum PE=4 SV=1                          |
| 237 | K4CW40     | Malate dehydrogenase OS=Solanum lycopersicum PE=3 SV=1                             |
| 238 | K4BK61     | D-3-phosphoglycerate dehydrogenase OS=Solanum lycopersicum PE=3 SV=1               |
| 239 | K4C891     | Uncharacterized protein OS=Solanum lycopersicum PE=4 SV=1                          |
| 240 | K4D810     | Uncharacterized protein OS=Solanum lycopersicum PE=4 SV=1                          |
| 241 | K4BFZ6     | Uncharacterized protein OS=Solanum lycopersicum PE=4 SV=1                          |
| 242 | K4BJC8     | Uncharacterized protein OS=Solanum lycopersicum PE=4 SV=1                          |
| 243 | K4CUI0     | Uncharacterized protein OS=Solanum lycopersicum PE=4 SV=1                          |
| 244 | K4CID9     | Uncharacterized protein OS=Solanum lycopersicum PE=4 SV=1                          |



|     |        |                                                                                   |
|-----|--------|-----------------------------------------------------------------------------------|
| 245 | K4D378 | Coatomer subunit beta OS=Solanum lycopersicum PE=4 SV=1                           |
| 246 | K4BXD4 | Uncharacterized protein OS=Solanum lycopersicum PE=4 SV=1                         |
| 247 | K4AST1 | Coatomer subunit beta OS=Solanum lycopersicum PE=4 SV=1                           |
| 248 | K4AYY2 | Uncharacterized protein OS=Solanum lycopersicum PE=4 SV=1                         |
| 249 | K4B406 | Uncharacterized protein OS=Solanum lycopersicum PE=4 SV=1                         |
| 250 | K4CUR8 | Uncharacterized protein OS=Solanum lycopersicum PE=4 SV=1                         |
| 251 | K4CJH4 | Proteasome subunit alpha type OS=Solanum lycopersicum PE=3 SV=1                   |
| 252 | Q5QJB4 | Harpin binding protein 1 OS=Solanum lycopersicum GN=HrBP1 PE=2 SV=1               |
| 253 | K4ASQ6 | Uncharacterized protein OS=Solanum lycopersicum PE=4 SV=1                         |
| 254 | K4B832 | Proteasome subunit alpha type OS=Solanum lycopersicum PE=3 SV=1                   |
| 255 | K4D4H7 | Uncharacterized protein OS=Solanum lycopersicum PE=4 SV=1                         |
| 256 | K4CB65 | Uncharacterized protein OS=Solanum lycopersicum PE=4 SV=1                         |
| 257 | K4BIL3 | Uncharacterized protein OS=Solanum lycopersicum PE=4 SV=1                         |
| 258 | K4D3T8 | Uncharacterized protein OS=Solanum lycopersicum PE=4 SV=1                         |
| 259 | K4CG62 | Uncharacterized protein OS=Solanum lycopersicum PE=3 SV=1                         |
| 260 | K4CF70 | Fatty acid hydroperoxide lyase, chloroplastic OS=Solanum lycopersicum GN=HPL PE=1 |
| 261 | K4BJE6 | Alanine--tRNA ligase OS=Solanum lycopersicum PE=3 SV=1                            |
| 262 | K4B171 | Uncharacterized protein OS=Solanum lycopersicum PE=4 SV=1                         |
| 263 | K4B3H9 | Uncharacterized protein OS=Solanum lycopersicum PE=4 SV=1                         |
| 264 | K4BNT4 | Uncharacterized protein OS=Solanum lycopersicum PE=4 SV=1                         |
| 265 | K4BMW3 | Uncharacterized protein OS=Solanum lycopersicum PE=3 SV=1                         |
| 266 | K4CFM5 | Ketol-acid reductoisomerase OS=Solanum lycopersicum PE=3 SV=1                     |
| 267 | O82545 | Cytosolic class II small heat shock protein HCT2 OS=Solanum lycopersicum GN=HSP17 |
| 268 | K4B407 | Proteasome subunit alpha type OS=Solanum lycopersicum PE=3 SV=1                   |
| 269 | K4CVP8 | Uncharacterized protein OS=Solanum lycopersicum PE=4 SV=1                         |
| 270 | K4CXJ6 | Uncharacterized protein OS=Solanum lycopersicum PE=3 SV=1                         |
| 271 | K4D3B5 | Uncharacterized protein OS=Solanum lycopersicum PE=3 SV=1                         |
| 272 | K4BLQ0 | Uncharacterized protein OS=Solanum lycopersicum PE=3 SV=1                         |
| 273 | K4B838 | Uncharacterized protein OS=Solanum lycopersicum PE=3 SV=1                         |
| 274 | K4B319 | Uncharacterized protein OS=Solanum lycopersicum PE=4 SV=1                         |
| 275 | K4BVU7 | Uncharacterized protein OS=Solanum lycopersicum PE=3 SV=1                         |
| 276 | K4AYP6 | Uncharacterized protein OS=Solanum lycopersicum PE=4 SV=1                         |
| 277 | K4C3U9 | Pectinesterase OS=Solanum lycopersicum PE=4 SV=1                                  |
| 278 | K4CVK9 | Uncharacterized protein OS=Solanum lycopersicum PE=4 SV=1                         |
| 279 | K4B5Z2 | Uncharacterized protein OS=Solanum lycopersicum PE=3 SV=1                         |
| 280 | K4DA30 | Uncharacterized protein OS=Solanum lycopersicum PE=4 SV=1                         |
| 281 | K4CGL2 | Uncharacterized protein OS=Solanum lycopersicum PE=4 SV=1                         |
| 282 | K4DAS6 | Uncharacterized protein OS=Solanum lycopersicum PE=3 SV=1                         |
| 283 | K4BT19 | Uncharacterized protein OS=Solanum lycopersicum PE=3 SV=1                         |
| 284 | K4BV28 | Uncharacterized protein OS=Solanum lycopersicum PE=3 SV=1                         |
| 285 | K4CHJ6 | 40S ribosomal protein S8 OS=Solanum lycopersicum PE=3 SV=1                        |
| 286 | K4CMT7 | 60S ribosomal protein L13 OS=Solanum lycopersicum PE=3 SV=1                       |
| 287 | K4B169 | Uncharacterized protein OS=Solanum lycopersicum PE=3 SV=1                         |
| 288 | K4CB99 | Uncharacterized protein OS=Solanum lycopersicum PE=3 SV=1                         |
| 289 | K4BB06 | Proteasome subunit beta type OS=Solanum lycopersicum GN=26S beta subunit PE=3     |
| 290 | K4C2U9 | Uncharacterized protein OS=Solanum lycopersicum PE=4 SV=1                         |
| 291 | K4C956 | Uncharacterized protein OS=Solanum lycopersicum PE=3 SV=1                         |
| 292 | K4B124 | Uncharacterized protein OS=Solanum lycopersicum PE=4 SV=1                         |
| 293 | K4B3G7 | Coatomer subunit gamma OS=Solanum lycopersicum PE=3 SV=1                          |

|     |            |                                                                                        |
|-----|------------|----------------------------------------------------------------------------------------|
| 294 | K4B778     | Uncharacterized protein OS=Solanum lycopersicum PE=4 SV=1                              |
| 295 | K4C711     | Uncharacterized protein OS=Solanum lycopersicum PE=3 SV=1                              |
| 296 | O24031     | Probable phospholipid hydroperoxide glutathione peroxidase OS=Solanum lycopersicum     |
| 297 | K4B846     | 60S ribosomal protein L18a OS=Solanum lycopersicum PE=3 SV=1                           |
| 298 | K4AXV8     | Uncharacterized protein OS=Solanum lycopersicum PE=4 SV=1                              |
| 299 | K4CW98     | Uncharacterized protein OS=Solanum lycopersicum PE=4 SV=1                              |
| 300 | K4DCJ9     | Uncharacterized protein OS=Solanum lycopersicum PE=4 SV=1                              |
| 301 | K4B0U7     | Uncharacterized protein OS=Solanum lycopersicum PE=4 SV=1                              |
| 302 | K4DAA0     | Uncharacterized protein OS=Solanum lycopersicum PE=3 SV=1                              |
| 303 | K4D3M1     | Uncharacterized protein OS=Solanum lycopersicum PE=4 SV=1                              |
| 304 | K4DHD2     | 6,7-dimethyl-8-ribityllumazine synthase OS=Solanum lycopersicum PE=3 SV=1              |
| 305 | K4C2V5     | T-complex protein 1 subunit gamma OS=Solanum lycopersicum PE=3 SV=1                    |
| 306 | K4C7I8     | 60S ribosomal protein L18a OS=Solanum lycopersicum PE=3 SV=1                           |
| 307 | K4AYN0     | Uncharacterized protein OS=Solanum lycopersicum PE=3 SV=1                              |
| 308 | K4BX34     | Fructose-bisphosphate aldolase OS=Solanum lycopersicum PE=3 SV=1                       |
| 309 | K4C7C4     | Uncharacterized protein OS=Solanum lycopersicum PE=4 SV=1                              |
| 310 | K4AYA3     | Uncharacterized protein OS=Solanum lycopersicum PE=3 SV=1                              |
| 311 | K4BW97     | Uncharacterized protein OS=Solanum lycopersicum PE=3 SV=1                              |
| 312 | K4AZZ5     | Uncharacterized protein OS=Solanum lycopersicum PE=4 SV=1                              |
| 313 | K4DAV2     | Uncharacterized protein OS=Solanum lycopersicum PE=4 SV=1                              |
| 314 | K4BKY8     | Uncharacterized protein OS=Solanum lycopersicum PE=4 SV=1                              |
| 315 | K4BC25     | Uncharacterized protein OS=Solanum lycopersicum PE=3 SV=1                              |
| 316 | K4CN10     | Uncharacterized protein OS=Solanum lycopersicum PE=4 SV=1                              |
| 317 | K4CAC1     | Uncharacterized protein OS=Solanum lycopersicum PE=3 SV=1                              |
| 318 | K4DHK7     | Uncharacterized protein OS=Solanum lycopersicum PE=3 SV=1                              |
| 319 | K4CXX8     | Proteasome subunit alpha type OS=Solanum lycopersicum PE=3 SV=1                        |
| 320 | K4CM58     | Eukaryotic translation initiation factor 3 subunit L OS=Solanum lycopersicum PE=3 SV=1 |
| 321 | K4BAW0     | Fructose-bisphosphate aldolase OS=Solanum lycopersicum PE=3 SV=1                       |
| 322 | K4AZ16     | Uncharacterized protein OS=Solanum lycopersicum PE=3 SV=1                              |
| 323 | K4BDH9     | Glucose-6-phosphate 1-dehydrogenase OS=Solanum lycopersicum PE=3 SV=1                  |
| 324 | K4C8T4     | 40S ribosomal protein SA OS=Solanum lycopersicum PE=3 SV=1                             |
| 325 | K4DF88     | Uncharacterized protein OS=Solanum lycopersicum PE=4 SV=1                              |
| 326 | K4BF45     | Uncharacterized protein OS=Solanum lycopersicum PE=4 SV=1                              |
| 327 | K4BRR1     | Uncharacterized protein OS=Solanum lycopersicum PE=4 SV=1                              |
| 328 | K4BL38     | Uncharacterized protein OS=Solanum lycopersicum PE=4 SV=1                              |
| 329 | A0A170RBI7 | Harpin inducing protein (Fragment) OS=Solanum lycopersicum GN=Hin1 PE=2 SV=1           |
| 330 | K4DFY4     | Uncharacterized protein OS=Solanum lycopersicum PE=3 SV=1                              |
| 331 | E2GLP5     | Defensin-like protein (Fragment) OS=Solanum lycopersicum var. cerasiforme PE=2 SV=1    |
| 332 | Q40143     | Cysteine proteinase 3 OS=Solanum lycopersicum GN=CYP-3 PE=2 SV=1                       |
| 333 | K4BVG7     | Uncharacterized protein OS=Solanum lycopersicum PE=3 SV=1                              |
| 334 | K4CTF6     | 40S ribosomal protein S8 OS=Solanum lycopersicum PE=3 SV=1                             |
| 335 | K4DHA3     | 40S ribosomal protein S6 OS=Solanum lycopersicum PE=3 SV=1                             |
| 336 | K4D7X4     | Uncharacterized protein OS=Solanum lycopersicum PE=4 SV=1                              |
| 337 | G3JX11     | Methionine sulfoxide reductase A OS=Solanum lycopersicum GN=MSRA PE=3 SV=1             |
| 338 | Q8W5A3     | Lethal leaf spot 1-like protein OS=Solanum lycopersicum PE=2 SV=1                      |
| 339 | K4BDC5     | Uncharacterized protein OS=Solanum lycopersicum PE=4 SV=1                              |
| 340 | K4CI93     | 40S ribosomal protein S6 OS=Solanum lycopersicum PE=3 SV=1                             |
| 341 | G8IIJ5     | Histone H2A (Fragment) OS=Solanum lycopersicum GN=HTA6 PE=2 SV=1                       |
| 342 | K4BG20     | Uncharacterized protein OS=Solanum lycopersicum PE=3 SV=1                              |

|     |        |                                                                                   |
|-----|--------|-----------------------------------------------------------------------------------|
| 343 | K4B111 | Uncharacterized protein OS=Solanum lycopersicum PE=3 SV=1                         |
| 344 | K4C3E8 | Uncharacterized protein OS=Solanum lycopersicum PE=3 SV=1                         |
| 345 | K4CB31 | Transmembrane 9 superfamily member OS=Solanum lycopersicum PE=3 SV=1              |
| 346 | K4BI36 | Uncharacterized protein OS=Solanum lycopersicum PE=3 SV=1                         |
| 347 | K4CHF9 | Uncharacterized protein OS=Solanum lycopersicum PE=4 SV=1                         |
| 348 | K4BN62 | Pectinesterase OS=Solanum lycopersicum PE=4 SV=1                                  |
| 349 | K4CG68 | Uncharacterized protein OS=Solanum lycopersicum PE=4 SV=1                         |
| 350 | K4BAN9 | Uncharacterized protein OS=Solanum lycopersicum PE=4 SV=1                         |
| 351 | K4D358 | Uncharacterized protein OS=Solanum lycopersicum PE=4 SV=1                         |
| 352 | K4CSH4 | Uncharacterized protein OS=Solanum lycopersicum PE=3 SV=1                         |
| 353 | K4CNF2 | Isocitrate dehydrogenase [NAD] subunit, mitochondrial OS=Solanum lycopersicum PE= |
| 354 | K4BLN0 | Uncharacterized protein OS=Solanum lycopersicum PE=4 SV=1                         |
| 355 | K4C3V1 | Ribosomal protein L19 OS=Solanum lycopersicum PE=3 SV=1                           |
| 356 | P38547 | GTP-binding nuclear protein Ran2 OS=Solanum lycopersicum GN=RAN2 PE=2 SV=1        |
| 357 | K4C5P1 | Ferritin OS=Solanum lycopersicum PE=3 SV=1                                        |
| 358 | K4AZ93 | Uncharacterized protein OS=Solanum lycopersicum PE=4 SV=1                         |
| 359 | B8YGR0 | Cytosolic ascorbate peroxidase 2 (Fragment) OS=Solanum lycopersicum PE=2 SV=1     |
| 360 | K4D831 | Uncharacterized protein OS=Solanum lycopersicum PE=3 SV=1                         |
| 361 | K4B1M7 | Uncharacterized protein OS=Solanum lycopersicum PE=4 SV=1                         |
| 362 | K4CR67 | Histone H2A OS=Solanum lycopersicum PE=3 SV=1                                     |
| 363 | K4CZS1 | Uncharacterized protein OS=Solanum lycopersicum PE=4 SV=1                         |
| 364 | K4DB32 | Histone H2A OS=Solanum lycopersicum PE=3 SV=1                                     |
| 365 | K4CNR8 | Uncharacterized protein OS=Solanum lycopersicum PE=4 SV=1                         |
| 366 | K4CHA8 | Uncharacterized protein OS=Solanum lycopersicum PE=4 SV=1                         |
| 367 | K4B9Y6 | Pyrophosphate--fructose 6-phosphate 1-phosphotransferase subunit beta OS=Solanu   |
| 368 | Q5NE21 | Carbonic anhydrase OS=Solanum lycopersicum GN=ca1 PE=2 SV=1                       |
| 369 | K4B2Y0 | Uncharacterized protein OS=Solanum lycopersicum PE=4 SV=1                         |
| 370 | K4D7V9 | Uncharacterized protein OS=Solanum lycopersicum PE=4 SV=1                         |
| 371 | K4C3D3 | Uncharacterized protein OS=Solanum lycopersicum PE=4 SV=1                         |
| 372 | K4CI69 | Uncharacterized protein OS=Solanum lycopersicum PE=4 SV=1                         |
| 373 | K4ASC8 | Uncharacterized protein OS=Solanum lycopersicum PE=3 SV=1                         |
| 374 | K4BMH6 | Uncharacterized protein OS=Solanum lycopersicum PE=4 SV=1                         |
| 375 | K4CXM8 | Uncharacterized protein OS=Solanum lycopersicum PE=3 SV=1                         |
| 376 | K4BS18 | Uncharacterized protein OS=Solanum lycopersicum PE=4 SV=1                         |
| 377 | K4BPV3 | Uncharacterized protein OS=Solanum lycopersicum PE=4 SV=1                         |
| 378 | K4B5E1 | Uncharacterized protein OS=Solanum lycopersicum PE=4 SV=1                         |
| 379 | K4BF34 | Uncharacterized protein OS=Solanum lycopersicum PE=4 SV=1                         |
| 380 | K4BLG1 | Uncharacterized protein OS=Solanum lycopersicum PE=4 SV=1                         |
| 381 | K4DA71 | Proteasome subunit beta type OS=Solanum lycopersicum PE=3 SV=1                    |
| 382 | K4CQB7 | Uncharacterized protein OS=Solanum lycopersicum PE=3 SV=1                         |
| 383 | K4CM80 | Uncharacterized protein OS=Solanum lycopersicum PE=4 SV=1                         |
| 384 | K4DBM0 | Histone H2A OS=Solanum lycopersicum PE=3 SV=1                                     |
| 385 | K4BJ57 | Uncharacterized protein OS=Solanum lycopersicum PE=4 SV=1                         |
| 386 | K4BH28 | Uncharacterized protein OS=Solanum lycopersicum PE=4 SV=1                         |
| 387 | K4BIB5 | Uncharacterized protein OS=Solanum lycopersicum PE=4 SV=1                         |
| 388 | K4CXV5 | Uncharacterized protein OS=Solanum lycopersicum PE=4 SV=1                         |
| 389 | K4CF48 | Uncharacterized protein OS=Solanum lycopersicum PE=3 SV=1                         |
| 390 | K4B046 | Uncharacterized protein OS=Solanum lycopersicum PE=3 SV=1                         |
| 391 | K4B1S1 | Uncharacterized protein OS=Solanum lycopersicum PE=3 SV=1                         |



392 Q66YT8 DWARF1/DIMINUTO OS=Solanum lycopersicum GN=DWF1 PE=2 SV=1  
393 K4DCC6 Transmembrane 9 superfamily member OS=Solanum lycopersicum PE=3 SV=1  
394 Q9SDZ6 Phospholipase D alpha (Fragment) OS=Solanum lycopersicum PE=2 SV=1  
395 K4B264 Uncharacterized protein OS=Solanum lycopersicum PE=3 SV=1  
396 P31542 ATP-dependent Clp protease ATP-binding subunit ClpA homolog CD4B, chloroplastic C  
397 K4CXS7 Uncharacterized protein OS=Solanum lycopersicum PE=4 SV=1  
398 K4CTJ3 Uncharacterized protein OS=Solanum lycopersicum PE=4 SV=1  
399 B1Q3F0 Glutamate decarboxylase OS=Solanum lycopersicum GN=LeGAD1 PE=2 SV=1  
400 K4BA92 Uncharacterized protein OS=Solanum lycopersicum PE=4 SV=1  
401 K4AXF7 Histone H3 OS=Solanum lycopersicum PE=3 SV=1  
402 K4C6M0 Ribosomal protein L15 OS=Solanum lycopersicum PE=3 SV=1  
403 K4AYJ2 Uncharacterized protein OS=Solanum lycopersicum PE=4 SV=1  
404 K4CMG7 Uncharacterized protein OS=Solanum lycopersicum PE=4 SV=1  
405 K4BM40 T-complex protein 1 subunit delta OS=Solanum lycopersicum PE=3 SV=1  
406 K4C949 60S ribosomal protein L27 OS=Solanum lycopersicum PE=3 SV=1  
407 K4CJ96 6,7-dimethyl-8-ribityllumazine synthase OS=Solanum lycopersicum PE=3 SV=1  
408 K4AWF0 Importin subunit alpha OS=Solanum lycopersicum PE=3 SV=1  
409 K4BDP2 Phosphorus transporter OS=Solanum lycopersicum PE=2 SV=1  
410 K4BT42 Uncharacterized protein OS=Solanum lycopersicum PE=4 SV=1  
411 K4BYA3 Proteasome subunit beta type OS=Solanum lycopersicum PE=3 SV=1  
412 Q40159 Late embryogenesis (Lea)-like protein OS=Solanum lycopersicum PE=2 SV=2  
413 K4CRC9 Uncharacterized protein OS=Solanum lycopersicum PE=4 SV=1  
414 K4CUX6 Elongation factor Tu OS=Solanum lycopersicum PE=3 SV=1  
415 K4DBN5 Uncharacterized protein OS=Solanum lycopersicum PE=4 SV=1  
416 K4CZD6 Uncharacterized protein OS=Solanum lycopersicum PE=4 SV=1  
417 K4D8X9 Uncharacterized protein OS=Solanum lycopersicum PE=4 SV=1  
418 K4DFU2 Uncharacterized protein OS=Solanum lycopersicum PE=3 SV=1  
419 K4AXN3 Uncharacterized protein OS=Solanum lycopersicum PE=4 SV=1  
420 K4B440 Uncharacterized protein OS=Solanum lycopersicum PE=4 SV=1  
421 K4BDE9 Uncharacterized protein OS=Solanum lycopersicum PE=4 SV=1  
422 K4CWY6 Metacaspase OS=Solanum lycopersicum GN=MCA PE=2 SV=1  
423 K4BKH5 Uncharacterized protein OS=Solanum lycopersicum PE=4 SV=1  
424 O82777 Subtilisin-like protease OS=Solanum lycopersicum GN=sbt3 PE=1 SV=1  
425 K4DEQ8 Uncharacterized protein OS=Solanum lycopersicum PE=4 SV=1  
426 P37218 Histone H1 OS=Solanum lycopersicum PE=3 SV=1  
427 K4C3K6 Uncharacterized protein OS=Solanum lycopersicum PE=4 SV=1  
428 K4DHI9 Uncharacterized protein OS=Solanum lycopersicum PE=4 SV=1  
429 O65820 Histone H1 OS=Solanum lycopersicum GN=H1 PE=2 SV=2  
430 K4CEJ5 60S ribosomal protein L27 OS=Solanum lycopersicum PE=3 SV=1  
431 K4C2E1 Uncharacterized protein OS=Solanum lycopersicum PE=4 SV=1  
432 K4AXF5 Uncharacterized protein OS=Solanum lycopersicum PE=4 SV=1  
433 K4B546 Obg-like ATPase 1 OS=Solanum lycopersicum PE=3 SV=1  
434 K4D601 Uncharacterized protein OS=Solanum lycopersicum PE=4 SV=1  
435 K4B6J6 Uncharacterized protein OS=Solanum lycopersicum PE=3 SV=1  
436 K4ATR9 Uncharacterized protein OS=Solanum lycopersicum PE=4 SV=1  
437 K4C2U7 Uncharacterized protein OS=Solanum lycopersicum PE=3 SV=1  
438 K4CN90 UMP-CMP kinase OS=Solanum lycopersicum PE=3 SV=1  
439 K4BHA1 Uncharacterized protein OS=Solanum lycopersicum PE=4 SV=1  
440 K4CHY4 Phosphoglycerate kinase OS=Solanum lycopersicum PE=3 SV=1

|     |        |                                                                                        |
|-----|--------|----------------------------------------------------------------------------------------|
| 441 | K4CA57 | Uncharacterized protein OS=Solanum lycopersicum PE=3 SV=1                              |
| 442 | K4B1G9 | Uncharacterized protein OS=Solanum lycopersicum PE=3 SV=1                              |
| 443 | K4DH61 | ATP-dependent 6-phosphofructokinase OS=Solanum lycopersicum GN=PFK PE=3 SV=1           |
| 444 | K4D2D7 | Uncharacterized protein OS=Solanum lycopersicum PE=4 SV=1                              |
| 445 | K4CR73 | Eukaryotic translation initiation factor 3 subunit A OS=Solanum lycopersicum PE=3 SV=1 |
| 446 | K4DC49 | Uncharacterized protein OS=Solanum lycopersicum PE=4 SV=1                              |
| 447 | K4C5M1 | Uncharacterized protein OS=Solanum lycopersicum PE=4 SV=1                              |
| 448 | K4CY11 | Uncharacterized protein OS=Solanum lycopersicum PE=4 SV=1                              |
| 449 | K4CA55 | Peptidyl-prolyl cis-trans isomerase OS=Solanum lycopersicum PE=3 SV=1                  |
| 450 | K4C875 | Uncharacterized protein OS=Solanum lycopersicum PE=4 SV=1                              |
| 451 | K4BVV2 | Uncharacterized protein OS=Solanum lycopersicum PE=3 SV=1                              |
| 452 | K4BVI8 | V-type proton ATPase proteolipid subunit OS=Solanum lycopersicum PE=3 SV=1             |
| 453 | Q8JQG8 | Nucleoprotein OS=Tomato spotted wilt virus (strain SA-05) GN=N PE=3 SV=1               |
| 454 | K4BEJ6 | Reticulon-like protein OS=Solanum lycopersicum PE=4 SV=1                               |
| 455 | K4BPK4 | Uncharacterized protein OS=Solanum lycopersicum PE=3 SV=1                              |
| 456 | Q94K24 | Ran binding protein-1 OS=Solanum lycopersicum GN=RanBP1 PE=2 SV=1                      |
| 457 | K4B117 | Uncharacterized protein OS=Solanum lycopersicum PE=4 SV=1                              |
| 458 | K4AZT2 | Uncharacterized protein OS=Solanum lycopersicum PE=4 SV=1                              |
| 459 | K4BMV8 | Protein ROOT HAIR DEFECTIVE 3 homolog OS=Solanum lycopersicum PE=3 SV=1                |
| 460 | K4CC33 | Uncharacterized protein OS=Solanum lycopersicum PE=4 SV=1                              |
| 461 | K4CH35 | Uncharacterized protein OS=Solanum lycopersicum PE=4 SV=1                              |
| 462 | K4D417 | Uncharacterized protein OS=Solanum lycopersicum PE=4 SV=1                              |
| 463 | Q9FVH1 | Transaldolase OS=Solanum lycopersicum GN=TAL PE=2 SV=1                                 |
| 464 | K4D529 | Uncharacterized protein OS=Solanum lycopersicum PE=4 SV=1                              |
| 465 | K4C8C0 | Uncharacterized protein OS=Solanum lycopersicum PE=4 SV=1                              |
| 466 | K4C286 | Uncharacterized protein OS=Solanum lycopersicum PE=4 SV=1                              |
| 467 | K4DHU1 | Uncharacterized protein OS=Solanum lycopersicum PE=4 SV=1                              |
| 468 | Q8L7T2 | Small heat shock protein OS=Solanum lycopersicum GN=vis1 PE=3 SV=1                     |
| 469 | K4CNT4 | Uncharacterized protein OS=Solanum lycopersicum PE=4 SV=1                              |
| 470 | K4ASJ4 | Uncharacterized protein OS=Solanum lycopersicum PE=3 SV=1                              |
| 471 | K4CPN0 | Uncharacterized protein OS=Solanum lycopersicum PE=4 SV=1                              |
| 472 | K4BF68 | Uncharacterized protein OS=Solanum lycopersicum PE=3 SV=1                              |
| 473 | K4C4X4 | 60S ribosomal protein L36 OS=Solanum lycopersicum PE=3 SV=1                            |
| 474 | K4BB90 | Uncharacterized protein OS=Solanum lycopersicum PE=3 SV=1                              |
| 475 | K4CPR6 | Uncharacterized protein OS=Solanum lycopersicum PE=4 SV=1                              |
| 476 | K4BPH8 | Uncharacterized protein OS=Solanum lycopersicum PE=3 SV=1                              |
| 477 | K4C3C9 | Uncharacterized protein OS=Solanum lycopersicum PE=4 SV=1                              |
| 478 | K4BJL4 | Uncharacterized protein OS=Solanum lycopersicum PE=4 SV=1                              |
| 479 | K4B7Y4 | Uncharacterized protein OS=Solanum lycopersicum PE=4 SV=1                              |
| 480 | K4DGU3 | Polyadenylate-binding protein OS=Solanum lycopersicum PE=3 SV=1                        |
| 481 | K4CYF5 | Uncharacterized protein OS=Solanum lycopersicum PE=4 SV=1                              |
| 482 | K4BA70 | Uncharacterized protein OS=Solanum lycopersicum PE=3 SV=1                              |
| 483 | K4BP08 | Uncharacterized protein OS=Solanum lycopersicum PE=4 SV=1                              |
| 484 | K4D616 | Uncharacterized protein OS=Solanum lycopersicum PE=4 SV=1                              |
| 485 | K4CAL8 | Uncharacterized protein OS=Solanum lycopersicum PE=4 SV=1                              |
| 486 | K4BDF6 | Uncharacterized protein OS=Solanum lycopersicum PE=3 SV=1                              |
| 487 | K4C1V6 | Phosphoinositide phospholipase C OS=Solanum lycopersicum PE=4 SV=1                     |
| 488 | K4C7T7 | Uncharacterized protein OS=Solanum lycopersicum PE=4 SV=1                              |
| 489 | P47921 | Nucleoside diphosphate kinase (Fragment) OS=Solanum lycopersicum PE=2 SV=1             |

|     |        |                                                                                 |
|-----|--------|---------------------------------------------------------------------------------|
| 490 | K4C310 | Uncharacterized protein OS=Solanum lycopersicum PE=4 SV=1                       |
| 491 | K4CTV6 | Uncharacterized protein OS=Solanum lycopersicum PE=3 SV=1                       |
| 492 | K4BJG4 | Uncharacterized protein OS=Solanum lycopersicum PE=3 SV=1                       |
| 493 | K4C4V7 | Uncharacterized protein OS=Solanum lycopersicum PE=3 SV=1                       |
| 494 | K4BSP6 | Uncharacterized protein OS=Solanum lycopersicum PE=4 SV=1                       |
| 495 | K4B1X9 | Uncharacterized protein OS=Solanum lycopersicum PE=4 SV=1                       |
| 496 | K4B012 | Uncharacterized protein OS=Solanum lycopersicum PE=4 SV=1                       |
| 497 | K4AT29 | Uncharacterized protein OS=Solanum lycopersicum PE=4 SV=1                       |
| 498 | Q6LB28 | Histone H3 OS=Solanum lycopersicum PE=2 SV=1                                    |
| 499 | K4BJE2 | Uncharacterized protein OS=Solanum lycopersicum PE=4 SV=1                       |
| 500 | K4BV04 | Uncharacterized protein OS=Solanum lycopersicum PE=4 SV=1                       |
| 501 | K4BMP8 | Malic enzyme OS=Solanum lycopersicum PE=3 SV=1                                  |
| 502 | K4DA57 | Uncharacterized protein OS=Solanum lycopersicum PE=3 SV=1                       |
| 503 | V5YN12 | Tonoplast intrinsic protein 21 OS=Solanum lycopersicum GN=TIP2;1 PE=2 SV=1      |
| 504 | K4CAH4 | Uncharacterized protein OS=Solanum lycopersicum PE=4 SV=1                       |
| 505 | K4BDD3 | Uncharacterized protein OS=Solanum lycopersicum PE=4 SV=1                       |
| 506 | K4C2J8 | Uncharacterized protein OS=Solanum lycopersicum PE=4 SV=1                       |
| 507 | Q9XEX8 | Remorin 1 OS=Solanum lycopersicum GN=rem-1 PE=2 SV=1                            |
| 508 | K4CF01 | Uncharacterized protein OS=Solanum lycopersicum PE=4 SV=1                       |
| 509 | K4ATL5 | Uncharacterized protein OS=Solanum lycopersicum PE=4 SV=1                       |
| 510 | K4B3E8 | Uncharacterized protein OS=Solanum lycopersicum PE=4 SV=1                       |
| 511 | A6YS00 | Zeta-carotene desaturase OS=Solanum lycopersicum GN=ZDS PE=2 SV=1               |
| 512 | K4DF02 | Uncharacterized protein OS=Solanum lycopersicum PE=3 SV=1                       |
| 513 | Q2PQI9 | Nascent polypeptide-associated complex subunit beta OS=Solanum lycopersicum GN= |
| 514 | K4CDL3 | Aspartate aminotransferase OS=Solanum lycopersicum PE=4 SV=1                    |
| 515 | K4D6M8 | Dihydrolipoamide acetyltransferase component of pyruvate dehydrogenase complex  |
| 516 | K4CX83 | Glyceraldehyde-3-phosphate dehydrogenase OS=Solanum lycopersicum PE=3 SV=1      |
| 517 | K4C5Y9 | Uncharacterized protein OS=Solanum lycopersicum PE=4 SV=1                       |
| 518 | K4DB71 | Uncharacterized protein OS=Solanum lycopersicum PE=4 SV=1                       |
| 519 | K4CAL7 | Uncharacterized protein OS=Solanum lycopersicum PE=3 SV=1                       |
| 520 | K4D340 | Uncharacterized protein OS=Solanum lycopersicum PE=4 SV=1                       |
| 521 | K4D2B1 | Uncharacterized protein OS=Solanum lycopersicum PE=4 SV=1                       |
| 522 | K4BG21 | Uncharacterized protein OS=Solanum lycopersicum PE=4 SV=1                       |
| 523 | B1Q3F8 | Succinic semialdehyde dehydrogenase OS=Solanum lycopersicum GN=LeSSADH PE=2     |
| 524 | K4C9A8 | Uncharacterized protein OS=Solanum lycopersicum PE=4 SV=1                       |
| 525 | K4BJZ4 | Uncharacterized protein OS=Solanum lycopersicum PE=4 SV=1                       |
| 526 | K4AZQ9 | Reticulon-like protein OS=Solanum lycopersicum PE=4 SV=1                        |
| 527 | K4BMF8 | Uncharacterized protein OS=Solanum lycopersicum PE=4 SV=1                       |
| 528 | K4CX85 | Uncharacterized protein OS=Solanum lycopersicum PE=4 SV=1                       |
| 529 | K4DCL7 | Uncharacterized protein OS=Solanum lycopersicum PE=4 SV=1                       |
| 530 | K4B0H4 | 40S ribosomal protein S24 OS=Solanum lycopersicum PE=3 SV=1                     |
| 531 | K4B172 | Uncharacterized protein OS=Solanum lycopersicum PE=3 SV=1                       |
| 532 | K4D1U0 | Uncharacterized protein OS=Solanum lycopersicum PE=4 SV=1                       |
| 533 | K4CXI9 | Uncharacterized protein OS=Solanum lycopersicum PE=4 SV=1                       |
| 534 | K4AUV5 | Uncharacterized protein OS=Solanum lycopersicum PE=4 SV=1                       |
| 535 | K4CWY7 | Uncharacterized protein OS=Solanum lycopersicum PE=4 SV=1                       |
| 536 | K4BPS0 | Uncharacterized protein OS=Solanum lycopersicum PE=4 SV=1                       |
| 537 | K4BJ07 | Uncharacterized protein OS=Solanum lycopersicum PE=4 SV=1                       |
| 538 | Q9FR30 | Ripening regulated protein DDTFR10 OS=Solanum lycopersicum GN=DDTFR10 PE=2 SV=1 |

539 K4C6V9 Uncharacterized protein OS=Solanum lycopersicum PE=4 SV=1  
540 K4BKE0 Uncharacterized protein OS=Solanum lycopersicum PE=4 SV=1  
541 K4D4Q9 Uncharacterized protein OS=Solanum lycopersicum PE=3 SV=1  
542 K4C263 Uncharacterized protein OS=Solanum lycopersicum PE=4 SV=1  
543 K4B7P2 Uncharacterized protein OS=Solanum lycopersicum PE=3 SV=1  
544 K4BTH6 Peroxidase OS=Solanum lycopersicum PE=3 SV=1  
545 K4CJE1 Uncharacterized protein OS=Solanum lycopersicum PE=3 SV=1  
546 K4B9B8 Uncharacterized protein OS=Solanum lycopersicum PE=4 SV=1  
547 K4B3I4 Response to dessication 2 OS=Solanum lycopersicum GN=Rd2 PE=2 SV=1  
548 K4BV31 Uncharacterized protein OS=Solanum lycopersicum PE=3 SV=1  
549 K4BN53 Uncharacterized protein OS=Solanum lycopersicum PE=3 SV=1  
550 Q40I33 Alcohol dehydrogenase homolog (Fragment) OS=Solanum lycopersicum GN=GAD3 PE=3 SV=1  
551 K4C2X8 Uncharacterized protein OS=Solanum lycopersicum PE=3 SV=1  
552 K4D0Q5 Uncharacterized protein OS=Solanum lycopersicum PE=3 SV=1  
553 K4BK69 Elongation factor Tu OS=Solanum lycopersicum PE=3 SV=1  
554 K4BE37 Uncharacterized protein OS=Solanum lycopersicum PE=4 SV=1  
555 K4C8Q9 Uncharacterized protein OS=Solanum lycopersicum PE=3 SV=1  
556 K4C874 Uncharacterized protein OS=Solanum lycopersicum PE=4 SV=1  
557 Q5NE18 Formate dehydrogenase, mitochondrial OS=Solanum lycopersicum GN=fdh PE=2 SV=1  
558 K4DCH8 Oleosin OS=Solanum lycopersicum PE=3 SV=1  
559 K4CS61 Uncharacterized protein OS=Solanum lycopersicum PE=3 SV=1  
560 K4CB27 Uncharacterized protein OS=Solanum lycopersicum PE=4 SV=1  
561 K4CZH8 Uncharacterized protein OS=Solanum lycopersicum PE=4 SV=1  
562 K4D1F3 Plasmamembrane intrinsic protein 29 OS=Solanum lycopersicum GN=PIP2;9 PE=2 SV=1  
563 K4BMS6 Uncharacterized protein OS=Solanum lycopersicum PE=4 SV=1  
564 K4BD40 Uncharacterized protein OS=Solanum lycopersicum PE=4 SV=1  
565 K4CVA6 Uncharacterized protein OS=Solanum lycopersicum PE=4 SV=1  
566 K4DAG8 Uncharacterized protein OS=Solanum lycopersicum PE=3 SV=1  
567 K4BNV4 Uncharacterized protein OS=Solanum lycopersicum PE=3 SV=1  
568 K4CHY3 Phosphoglycerate kinase OS=Solanum lycopersicum PE=3 SV=1  
569 Q9FUR8 Alpha-galactosidase (Fragment) OS=Solanum lycopersicum PE=3 SV=1  
570 K4CSN4 Uncharacterized protein OS=Solanum lycopersicum PE=4 SV=1  
571 K4CWC4 PR10 protein OS=Solanum lycopersicum PE=2 SV=1  
572 Q9AXQ6 Eukaryotic translation initiation factor 5A-1 OS=Solanum lycopersicum PE=2 SV=1  
573 K4BUN4 Uncharacterized protein OS=Solanum lycopersicum PE=3 SV=1  
574 K4B9E1 Uncharacterized protein OS=Solanum lycopersicum PE=4 SV=1  
575 K4CET6 Uncharacterized protein OS=Solanum lycopersicum PE=4 SV=1  
576 K4DHC7 Uncharacterized protein OS=Solanum lycopersicum PE=4 SV=1  
577 K4BVG4 Uncharacterized protein OS=Solanum lycopersicum PE=4 SV=1  
578 K4AT78 Uncharacterized protein OS=Solanum lycopersicum PE=4 SV=1  
579 K4BW77 Uncharacterized protein OS=Solanum lycopersicum PE=4 SV=1  
580 K4D637 Uncharacterized protein OS=Solanum lycopersicum PE=4 SV=1  
581 K4B2H4 Uncharacterized protein OS=Solanum lycopersicum PE=3 SV=1  
582 K4DF81 Uncharacterized protein OS=Solanum lycopersicum PE=4 SV=1  
583 K4BDF9 Uncharacterized protein OS=Solanum lycopersicum PE=4 SV=1  
584 K4BNR3 Uncharacterized protein OS=Solanum lycopersicum PE=4 SV=1  
585 K4D276 Uncharacterized protein OS=Solanum lycopersicum PE=4 SV=1  
586 K4C2B3 Uncharacterized protein OS=Solanum lycopersicum PE=4 SV=1  
587 K4DA09 Uncharacterized protein OS=Solanum lycopersicum PE=4 SV=1

|     |        |                                                                                     |
|-----|--------|-------------------------------------------------------------------------------------|
| 588 | K4CLC9 | Serine hydroxymethyltransferase OS=Solanum lycopersicum PE=3 SV=1                   |
| 589 | K4BPG2 | Uncharacterized protein OS=Solanum lycopersicum PE=4 SV=1                           |
| 590 | Q7Y240 | Thioredoxin peroxidase 1 OS=Solanum lycopersicum GN=TPx1 PE=2 SV=1                  |
| 591 | K4BDZ7 | Uncharacterized protein OS=Solanum lycopersicum PE=4 SV=1                           |
| 592 | K4B0S9 | Mitochondrial Rho GTPase OS=Solanum lycopersicum PE=3 SV=1                          |
| 593 | K4B0I7 | Uncharacterized protein OS=Solanum lycopersicum PE=3 SV=1                           |
| 594 | K4CJ21 | Malic enzyme OS=Solanum lycopersicum PE=3 SV=1                                      |
| 595 | K4BDQ1 | Uncharacterized protein OS=Solanum lycopersicum PE=4 SV=1                           |
| 596 | K4B4N0 | Uncharacterized protein OS=Solanum lycopersicum PE=4 SV=1                           |
| 597 | K4BM13 | Uncharacterized protein OS=Solanum lycopersicum PE=4 SV=1                           |
| 598 | K4DBG6 | Reticulon-like protein OS=Solanum lycopersicum PE=4 SV=1                            |
| 599 | K4AT93 | Uncharacterized protein OS=Solanum lycopersicum PE=4 SV=1                           |
| 600 | K4CBV3 | Uncharacterized protein OS=Solanum lycopersicum PE=4 SV=1                           |
| 601 | K4B1S4 | Uncharacterized protein OS=Solanum lycopersicum PE=3 SV=1                           |
| 602 | K4BLW8 | Uncharacterized protein OS=Solanum lycopersicum PE=4 SV=1                           |
| 603 | K4D2D4 | Uncharacterized protein OS=Solanum lycopersicum PE=4 SV=1                           |
| 604 | K4CC14 | Uncharacterized protein OS=Solanum lycopersicum PE=3 SV=1                           |
| 605 | K4B413 | Uncharacterized protein OS=Solanum lycopersicum PE=3 SV=1                           |
| 606 | K4CYG5 | Reticulon-like protein OS=Solanum lycopersicum PE=4 SV=1                            |
| 607 | Q8SA58 | Putative uncoupling protein OS=Solanum lycopersicum PE=2 SV=1                       |
| 608 | K4BQ85 | Uncharacterized protein OS=Solanum lycopersicum PE=4 SV=1                           |
| 609 | K4BGT9 | Uncharacterized protein OS=Solanum lycopersicum PE=4 SV=1                           |
| 610 | K4BDI6 | Uncharacterized protein OS=Solanum lycopersicum PE=4 SV=1                           |
| 611 | K4BYC0 | Uncharacterized protein OS=Solanum lycopersicum PE=3 SV=1                           |
| 612 | K4D4V8 | Uncharacterized protein OS=Solanum lycopersicum PE=4 SV=1                           |
| 613 | K4BPJ4 | Uncharacterized protein OS=Solanum lycopersicum PE=4 SV=1                           |
| 614 | K4C882 | Uncharacterized protein OS=Solanum lycopersicum PE=4 SV=1                           |
| 615 | K4BVQ3 | Uncharacterized protein OS=Solanum lycopersicum PE=4 SV=1                           |
| 616 | K4D533 | Dihydrolipoamide acetyltransferase component of pyruvate dehydrogenase complex      |
| 617 | K4D9G1 | Uncharacterized protein OS=Solanum lycopersicum PE=4 SV=1                           |
| 618 | K4BXX0 | Uncharacterized protein OS=Solanum lycopersicum PE=3 SV=1                           |
| 619 | K4CHN2 | Uncharacterized protein OS=Solanum lycopersicum PE=4 SV=1                           |
| 620 | K4BVZ4 | Dolichyl-diphosphooligosaccharide--protein glycosyltransferase subunit 1 OS=Solanum |
| 621 | O04359 | Expansin OS=Solanum lycopersicum GN=LeEXP1 PE=2 SV=1                                |
| 622 | K4B0H5 | Uncharacterized protein OS=Solanum lycopersicum PE=4 SV=1                           |
| 623 | K4BVI9 | Uncharacterized protein OS=Solanum lycopersicum PE=4 SV=1                           |
| 624 | K4D5D2 | Beta-glucosidase OS=Solanum lycopersicum PE=3 SV=1                                  |
| 625 | K4AV20 | Uncharacterized protein OS=Solanum lycopersicum PE=4 SV=1                           |



| MW [kDa] | pI  | #Alt. Proteins | Scores                  | #Peptides | SC [%] | RMS90 [ppm] | Rank |
|----------|-----|----------------|-------------------------|-----------|--------|-------------|------|
| 97.1     | 5.6 | 3              | 3013.6 (M.score:3013.6) | 42        | 50.2   | 1.35        | 1    |
| 28.9     | 9.2 | 97             | 2330.2 (M.score:2330.2) | 28        | 58.1   | 0.99        | 2    |
| 61.5     | 5.5 | 1              | 1471.3 (M.score:1471.3) | 28        | 56.1   | 0.90        | 9    |
| 28.9     | 9.2 | 98             | 2127.5 (M.score:2127.5) | 27        | 62.4   | 0.92        | 4    |
| 29.0     | 9.0 | 2              | 2095.8 (M.score:2095.8) | 27        | 55.0   | 1.06        | 5    |
| 28.9     | 9.2 | 150            | 2254.3 (M.score:2254.3) | 26        | 52.7   | 0.99        | 3    |
| 61.1     | 5.8 | 1              | 1569.5 (M.score:1569.5) | 26        | 54.1   | 1.00        | 8    |
| 65.7     | 4.7 | 2              | 1363.9 (M.score:1363.9) | 25        | 46.2   | 0.95        | 12   |
| 93.3     | 4.9 | 1              | 1017.1 (M.score:1017.1) | 25        | 35.8   | 0.97        | 17   |
| 80.2     | 5.0 | 1              | 1259.5 (M.score:1259.5) | 23        | 30.3   | 0.82        | 13   |
| 63.0     | 5.7 | 1              | 1141.3 (M.score:1141.3) | 23        | 48.7   | 1.07        | 15   |
| 61.9     | 5.2 | 4              | 1204.2 (M.score:1204.2) | 22        | 45.4   | 0.91        | 14   |
| 70.2     | 5.2 | 2              | 1133.9 (M.score:1133.9) | 22        | 32.9   | 0.79        | 16   |
| 23.4     | 9.2 | 2              | 1620.8 (M.score:1620.8) | 20        | 56.7   | 0.72        | 6    |
| 28.8     | 9.3 | 1              | 1460.9 (M.score:1460.9) | 19        | 44.6   | 0.97        | 10   |
| 60.0     | 6.3 | 3              | 1393.3 (M.score:1393.3) | 19        | 41.8   | 0.76        | 11   |
| 41.0     | 6.0 | 4              | 880.7 (M.score:880.7)   | 19        | 55.5   | 0.76        | 20   |
| 101.1    | 5.8 | 3              | 802.0 (M.score:802.0)   | 19        | 28.4   | 0.93        | 29   |
| 23.0     | 8.8 | 3              | 1591.3 (M.score:1591.3) | 18        | 50.7   | 0.74        | 7    |
| 347.3    | 8.4 | 21             | 931.0 (M.score:931.0)   | 18        | 6.0    | 1.09        | 19   |
| 80.1     | 5.0 | 1              | 842.0 (M.score:842.0)   | 18        | 27.8   | 1.03        | 25   |
| 80.1     | 5.0 | 1              | 820.8 (M.score:820.8)   | 18        | 24.6   | 0.77        | 27   |
| 170.1    | 4.7 | 1              | 701.1 (M.score:701.1)   | 18        | 14.3   | 1.03        | 40   |
| 347.5    | 8.2 | 3              | 880.5 (M.score:880.5)   | 17        | 5.7    | 1.17        | 21   |
| 53.3     | 7.1 | 1              | 826.4 (M.score:826.4)   | 17        | 47.9   | 1.11        | 26   |
| 52.9     | 6.5 | 30             | 805.4 (M.score:805.4)   | 17        | 38.6   | 0.73        | 28   |
| 38.7     | 7.5 | 3              | 796.6 (M.score:796.6)   | 17        | 52.0   | 0.82        | 30   |
| 110.3    | 5.7 | 3              | 705.1 (M.score:705.1)   | 17        | 18.5   | 0.94        | 39   |
| 110.3    | 6.2 | 3              | 680.9 (M.score:680.9)   | 17        | 17.6   | 1.05        | 47   |
| 68.5     | 5.2 | 5              | 709.1 (M.score:709.1)   | 16        | 30.7   | 0.92        | 37   |
| 55.2     | 7.5 | 1              | 705.4 (M.score:705.4)   | 16        | 42.7   | 1.17        | 38   |
| 36.7     | 7.7 | 4              | 616.2 (M.score:616.2)   | 16        | 49.6   | 0.89        | 53   |
| 96.7     | 5.5 | 4              | 581.7 (M.score:581.7)   | 16        | 22.4   | 1.13        | 58   |
| 41.1     | 5.6 | 2              | 873.3 (M.score:873.3)   | 15        | 45.2   | 1.30        | 22   |
| 36.7     | 6.3 | 3              | 683.5 (M.score:683.5)   | 15        | 45.9   | 1.36        | 45   |
| 89.7     | 5.2 | 4              | 681.9 (M.score:681.9)   | 15        | 23.3   | 1.29        | 46   |
| 110.1    | 5.6 | 2              | 591.8 (M.score:591.8)   | 15        | 15.5   | 1.15        | 55   |
| 97.4     | 5.4 | 3              | 533.1 (M.score:533.1)   | 15        | 19.3   | 1.04        | 65   |
| 105.8    | 6.0 | 1              | 522.3 (M.score:522.3)   | 15        | 17.1   | 1.22        | 66   |
| 30.7     | 8.3 | 7              | 855.2 (M.score:855.2)   | 14        | 50.7   | 1.48        | 23   |
| 38.4     | 8.3 | 1              | 680.1 (M.score:680.1)   | 14        | 40.8   | 0.99        | 48   |
| 59.6     | 5.7 | 2              | 658.9 (M.score:658.9)   | 14        | 35.0   | 1.72        | 50   |
| 59.8     | 5.9 | 1              | 654.9 (M.score:654.9)   | 14        | 34.7   | 1.64        | 51   |
| 109.9    | 5.8 | 2              | 611.7 (M.score:611.7)   | 14        | 13.5   | 0.95        | 54   |
| 44.5     | 7.6 | 2              | 789.1 (M.score:789.1)   | 13        | 33.2   | 1.26        | 31   |
| 61.0     | 4.7 | 2              | 728.5 (M.score:728.5)   | 13        | 26.0   | 0.94        | 35   |
| 42.0     | 9.7 | 5              | 692.2 (M.score:692.2)   | 13        | 30.3   | 1.30        | 43   |
| 59.5     | 8.2 | 5              | 667.2 (M.score:667.2)   | 13        | 26.9   | 1.14        | 49   |

|       |     |                          |    |      |      |     |
|-------|-----|--------------------------|----|------|------|-----|
| 89.4  | 5.1 | 1 641.8 (M.score:641.8)  | 13 | 20.9 | 1.25 | 52  |
| 92.3  | 5.8 | 3 562.0 (M.score:562.0)  | 13 | 18.6 | 0.83 | 59  |
| 56.0  | 6.8 | 1 501.1 (M.score:501.1)  | 13 | 26.6 | 0.91 | 73  |
| 60.4  | 8.6 | 2 965.6 (M.score:965.6)  | 12 | 22.9 | 0.78 | 18  |
| 127.3 | 5.8 | 80 726.9 (M.score:726.9) | 12 | 10.1 | 1.39 | 36  |
| 41.8  | 5.3 | 8 694.4 (M.score:694.4)  | 12 | 40.3 | 0.57 | 42  |
| 41.7  | 5.3 | 1 686.8 (M.score:686.8)  | 12 | 40.3 | 0.56 | 44  |
| 71.3  | 5.1 | 11 589.0 (M.score:589.0) | 12 | 23.7 | 1.37 | 56  |
| 57.3  | 6.7 | 3 561.2 (M.score:561.2)  | 12 | 29.0 | 1.04 | 60  |
| 73.4  | 6.4 | 4 559.2 (M.score:559.2)  | 12 | 22.2 | 1.71 | 61  |
| 53.1  | 5.6 | 4 534.5 (M.score:534.5)  | 12 | 36.1 | 0.93 | 64  |
| 36.7  | 7.0 | 2 517.6 (M.score:517.6)  | 12 | 32.3 | 1.03 | 68  |
| 37.7  | 5.1 | 5 517.6 (M.score:517.6)  | 12 | 48.4 | 1.28 | 69  |
| 58.1  | 8.4 | 1 516.3 (M.score:516.3)  | 12 | 26.7 | 1.35 | 70  |
| 101.7 | 6.0 | 5 360.0 (M.score:360.0)  | 12 | 14.8 | 1.07 | 107 |
| 30.7  | 8.3 | 2 730.8 (M.score:730.8)  | 11 | 53.0 | 1.53 | 34  |
| 55.1  | 5.7 | 2 549.0 (M.score:549.0)  | 11 | 26.6 | 1.49 | 62  |
| 41.6  | 5.3 | 9 548.6 (M.score:548.6)  | 11 | 33.2 | 0.75 | 63  |
| 35.6  | 5.3 | 1 485.3 (M.score:485.3)  | 11 | 42.3 | 1.27 | 77  |
| 39.5  | 5.2 | 1 447.7 (M.score:447.7)  | 11 | 34.0 | 1.06 | 82  |
| 107.1 | 6.5 | 1 312.4 (M.score:312.4)  | 11 | 13.1 | 0.71 | 125 |
| 17.8  | 5.8 | 4 845.5 (M.score:845.5)  | 10 | 49.4 | 1.04 | 24  |
| 17.6  | 5.8 | 2 787.5 (M.score:787.5)  | 10 | 49.4 | 1.23 | 32  |
| 30.6  | 8.3 | 1 696.9 (M.score:696.9)  | 10 | 43.2 | 1.47 | 41  |
| 71.4  | 5.1 | 2 582.1 (M.score:582.1)  | 10 | 20.0 | 0.85 | 57  |
| 70.0  | 5.5 | 7 518.8 (M.score:518.8)  | 10 | 16.5 | 0.88 | 67  |
| 41.6  | 5.3 | 1 515.6 (M.score:515.6)  | 10 | 32.6 | 0.59 | 71  |
| 41.5  | 9.6 | 1 491.6 (M.score:491.6)  | 10 | 23.8 | 1.30 | 74  |
| 52.8  | 6.4 | 1 488.8 (M.score:488.8)  | 10 | 24.5 | 0.71 | 75  |
| 54.4  | 7.2 | 1 486.1 (M.score:486.1)  | 10 | 26.6 | 0.75 | 76  |
| 71.2  | 5.1 | 4 476.2 (M.score:476.2)  | 10 | 16.9 | 1.24 | 79  |
| 77.1  | 5.5 | 1 471.7 (M.score:471.7)  | 10 | 15.8 | 1.28 | 80  |
| 56.5  | 6.6 | 3 440.6 (M.score:440.6)  | 10 | 24.2 | 0.93 | 85  |
| 49.7  | 4.9 | 5 424.7 (M.score:424.7)  | 10 | 28.4 | 0.86 | 87  |
| 55.3  | 8.5 | 2 404.8 (M.score:404.8)  | 10 | 22.2 | 0.97 | 92  |
| 55.4  | 5.1 | 3 396.6 (M.score:396.6)  | 10 | 21.9 | 0.86 | 96  |
| 192.8 | 5.3 | 2 393.1 (M.score:393.1)  | 10 | 7.8  | 0.85 | 99  |
| 90.2  | 5.2 | 1 376.0 (M.score:376.0)  | 10 | 13.7 | 0.95 | 105 |
| 84.7  | 6.0 | 3 351.5 (M.score:351.5)  | 10 | 22.0 | 1.36 | 109 |
| 60.2  | 8.2 | 1 776.8 (M.score:776.8)  | 9  | 17.1 | 1.01 | 33  |
| 50.8  | 6.5 | 4 513.8 (M.score:513.8)  | 9  | 24.5 | 1.69 | 72  |
| 39.4  | 5.4 | 1 446.5 (M.score:446.5)  | 9  | 24.8 | 1.26 | 83  |
| 50.0  | 6.4 | 1 445.1 (M.score:445.1)  | 9  | 19.7 | 0.50 | 84  |
| 30.9  | 8.3 | 3 426.4 (M.score:426.4)  | 9  | 40.4 | 1.39 | 86  |
| 21.9  | 5.0 | 1 423.8 (M.score:423.8)  | 9  | 38.8 | 0.44 | 88  |
| 44.8  | 5.6 | 6 417.8 (M.score:417.8)  | 9  | 27.4 | 1.16 | 89  |
| 49.8  | 7.1 | 3 407.0 (M.score:407.0)  | 9  | 24.2 | 1.37 | 91  |
| 36.5  | 5.2 | 1 384.7 (M.score:384.7)  | 9  | 27.7 | 1.12 | 101 |
| 89.7  | 4.9 | 1 384.4 (M.score:384.4)  | 9  | 15.2 | 0.75 | 102 |

|       |      |     |                       |   |      |      |     |
|-------|------|-----|-----------------------|---|------|------|-----|
| 26.5  | 9.6  | 2   | 350.8 (M.score:350.8) | 9 | 36.6 | 0.44 | 110 |
| 74.4  | 5.4  | 2   | 342.2 (M.score:342.2) | 9 | 16.0 | 1.64 | 115 |
| 93.8  | 5.2  | 2   | 330.5 (M.score:330.5) | 9 | 15.7 | 0.88 | 119 |
| 52.5  | 8.0  | 210 | 330.2 (M.score:330.2) | 9 | 19.5 | 0.55 | 120 |
| 36.4  | 6.2  | 2   | 316.8 (M.score:316.8) | 9 | 22.2 | 0.54 | 123 |
| 67.4  | 6.6  | 1   | 309.5 (M.score:309.5) | 9 | 14.6 | 1.41 | 127 |
| 65.5  | 5.3  | 6   | 306.3 (M.score:306.3) | 9 | 19.9 | 1.35 | 129 |
| 116.4 | 6.2  | 2   | 273.3 (M.score:273.3) | 9 | 10.1 | 1.30 | 147 |
| 53.3  | 5.0  | 2   | 272.8 (M.score:272.8) | 9 | 19.0 | 0.93 | 148 |
| 17.6  | 5.8  | 1   | 471.5 (M.score:471.5) | 8 | 23.4 | 0.91 | 81  |
| 21.5  | 6.2  | 1   | 400.9 (M.score:400.9) | 8 | 44.9 | 0.97 | 94  |
| 57.5  | 6.5  | 1   | 397.7 (M.score:397.7) | 8 | 21.2 | 1.18 | 95  |
| 92.7  | 5.8  | 2   | 366.9 (M.score:366.9) | 8 | 13.3 | 1.43 | 106 |
| 118.4 | 6.0  | 7   | 347.4 (M.score:347.4) | 8 | 8.0  | 0.63 | 112 |
| 21.6  | 7.9  | 1   | 344.1 (M.score:344.1) | 8 | 33.3 | 0.67 | 113 |
| 66.9  | 5.8  | 2   | 337.9 (M.score:337.9) | 8 | 20.8 | 1.62 | 118 |
| 73.4  | 5.1  | 4   | 324.3 (M.score:324.3) | 8 | 11.4 | 1.45 | 121 |
| 122.5 | 5.9  | 2   | 303.4 (M.score:303.4) | 8 | 9.4  | 0.75 | 131 |
| 49.3  | 9.2  | 3   | 277.1 (M.score:277.1) | 8 | 22.1 | 0.62 | 143 |
| 28.6  | 4.8  | 1   | 271.8 (M.score:271.8) | 8 | 35.3 | 0.90 | 149 |
| 44.4  | 10.1 | 2   | 266.4 (M.score:266.4) | 8 | 17.2 | 0.52 | 156 |
| 50.6  | 7.1  | 2   | 258.4 (M.score:258.4) | 8 | 22.9 | 1.29 | 165 |
| 28.8  | 4.7  | 9   | 255.5 (M.score:255.5) | 8 | 31.4 | 0.45 | 170 |
| 108.1 | 7.3  | 1   | 253.9 (M.score:253.9) | 8 | 9.9  | 0.62 | 172 |
| 34.0  | 5.0  | 2   | 239.9 (M.score:239.9) | 8 | 43.0 | 1.42 | 177 |
| 17.6  | 5.6  | 2   | 483.5 (M.score:483.5) | 7 | 46.8 | 0.70 | 78  |
| 36.5  | 5.5  | 4   | 409.6 (M.score:409.6) | 7 | 31.8 | 1.47 | 90  |
| 20.7  | 6.4  | 7   | 403.8 (M.score:403.8) | 7 | 43.6 | 1.26 | 93  |
| 31.0  | 6.3  | 2   | 395.7 (M.score:395.7) | 7 | 32.3 | 0.90 | 97  |
| 21.9  | 7.8  | 1   | 395.2 (M.score:395.2) | 7 | 48.5 | 0.71 | 98  |
| 42.7  | 8.5  | 1   | 389.5 (M.score:389.5) | 7 | 18.5 | 1.19 | 100 |
| 29.5  | 6.7  | 2   | 383.1 (M.score:383.1) | 7 | 33.7 | 0.49 | 103 |
| 192.5 | 5.3  | 1   | 353.4 (M.score:353.4) | 7 | 6.0  | 0.55 | 108 |
| 20.3  | 7.6  | 1   | 349.3 (M.score:349.3) | 7 | 40.3 | 1.32 | 111 |
| 47.0  | 5.7  | 2   | 342.3 (M.score:342.3) | 7 | 18.2 | 0.65 | 114 |
| 47.3  | 5.9  | 1   | 310.7 (M.score:310.7) | 7 | 17.9 | 0.53 | 126 |
| 123.0 | 4.8  | 1   | 303.2 (M.score:303.2) | 7 | 8.7  | 1.17 | 132 |
| 27.3  | 6.1  | 1   | 299.4 (M.score:299.4) | 7 | 36.6 | 0.90 | 133 |
| 38.5  | 6.6  | 2   | 299.1 (M.score:299.1) | 7 | 24.3 | 1.77 | 134 |
| 50.2  | 4.7  | 10  | 298.6 (M.score:298.6) | 7 | 18.3 | 0.74 | 135 |
| 63.4  | 6.1  | 1   | 282.4 (M.score:282.4) | 7 | 14.2 | 1.54 | 140 |
| 32.4  | 5.7  | 1   | 274.7 (M.score:274.7) | 7 | 29.1 | 0.88 | 146 |
| 40.5  | 6.5  | 1   | 271.6 (M.score:271.6) | 7 | 22.2 | 1.03 | 151 |
| 35.1  | 6.3  | 3   | 267.6 (M.score:267.6) | 7 | 31.0 | 0.99 | 154 |
| 23.0  | 5.1  | 3   | 265.5 (M.score:265.5) | 7 | 39.3 | 0.98 | 158 |
| 64.1  | 5.7  | 4   | 265.4 (M.score:265.4) | 7 | 14.7 | 1.18 | 159 |
| 15.8  | 4.3  | 1   | 261.2 (M.score:261.2) | 7 | 54.8 | 1.31 | 162 |
| 59.6  | 8.4  | 1   | 259.1 (M.score:259.1) | 7 | 15.6 | 0.80 | 164 |
| 34.8  | 5.7  | 1   | 257.8 (M.score:257.8) | 7 | 21.8 | 0.84 | 167 |

|       |      |    |                       |   |      |      |     |
|-------|------|----|-----------------------|---|------|------|-----|
| 38.6  | 5.5  | 6  | 256.0 (M.score:256.0) | 7 | 34.7 | 1.18 | 169 |
| 29.7  | 9.8  | 1  | 254.4 (M.score:254.4) | 7 | 31.4 | 0.81 | 171 |
| 47.8  | 5.8  | 2  | 250.2 (M.score:250.2) | 7 | 18.2 | 0.63 | 173 |
| 39.3  | 5.4  | 3  | 227.4 (M.score:227.4) | 7 | 22.2 | 1.06 | 188 |
| 35.8  | 5.1  | 2  | 226.8 (M.score:226.8) | 7 | 26.0 | 0.94 | 190 |
| 29.7  | 9.8  | 1  | 215.4 (M.score:215.4) | 7 | 31.4 | 0.72 | 207 |
| 51.1  | 9.5  | 3  | 205.2 (M.score:205.2) | 7 | 16.9 | 0.98 | 220 |
| 67.3  | 6.8  | 1  | 184.8 (M.score:184.8) | 7 | 13.6 | 0.59 | 257 |
| 44.8  | 10.3 | 1  | 179.1 (M.score:179.1) | 7 | 21.2 | 0.85 | 263 |
| 15.8  | 10.0 | 12 | 376.5 (M.score:376.5) | 6 | 35.7 | 1.07 | 104 |
| 25.0  | 10.3 | 1  | 339.9 (M.score:339.9) | 6 | 30.0 | 0.82 | 116 |
| 27.2  | 5.6  | 1  | 319.9 (M.score:319.9) | 6 | 25.8 | 0.43 | 122 |
| 54.6  | 6.1  | 2  | 315.2 (M.score:315.2) | 6 | 16.5 | 0.70 | 124 |
| 47.0  | 5.9  | 2  | 295.2 (M.score:295.2) | 6 | 17.3 | 1.07 | 137 |
| 20.2  | 6.7  | 3  | 289.9 (M.score:289.9) | 6 | 38.3 | 1.35 | 139 |
| 55.1  | 5.7  | 1  | 280.5 (M.score:280.5) | 6 | 14.6 | 1.28 | 141 |
| 43.5  | 8.2  | 1  | 280.2 (M.score:280.2) | 6 | 18.1 | 1.27 | 142 |
| 29.9  | 5.5  | 1  | 277.1 (M.score:277.1) | 6 | 24.6 | 0.79 | 144 |
| 35.6  | 9.0  | 1  | 276.5 (M.score:276.5) | 6 | 25.3 | 1.23 | 145 |
| 50.9  | 6.9  | 2  | 270.2 (M.score:270.2) | 6 | 16.2 | 0.61 | 152 |
| 26.8  | 9.5  | 1  | 267.4 (M.score:267.4) | 6 | 28.5 | 0.77 | 155 |
| 58.4  | 5.4  | 1  | 266.3 (M.score:266.3) | 6 | 17.7 | 1.23 | 157 |
| 27.2  | 6.1  | 2  | 264.4 (M.score:264.4) | 6 | 29.3 | 0.97 | 160 |
| 29.4  | 4.7  | 4  | 238.0 (M.score:238.0) | 6 | 21.5 | 0.43 | 178 |
| 17.6  | 8.4  | 2  | 236.3 (M.score:236.3) | 6 | 40.1 | 0.89 | 180 |
| 40.5  | 5.6  | 5  | 225.3 (M.score:225.3) | 6 | 17.9 | 1.40 | 191 |
| 40.7  | 6.2  | 1  | 221.5 (M.score:221.5) | 6 | 13.7 | 0.39 | 194 |
| 63.1  | 5.9  | 2  | 217.0 (M.score:217.0) | 6 | 11.4 | 0.66 | 204 |
| 42.4  | 5.7  | 7  | 212.4 (M.score:212.4) | 6 | 18.3 | 0.92 | 210 |
| 25.9  | 9.4  | 3  | 210.5 (M.score:210.5) | 6 | 24.4 | 0.97 | 213 |
| 23.0  | 10.2 | 2  | 208.4 (M.score:208.4) | 6 | 26.9 | 0.43 | 216 |
| 108.0 | 5.3  | 1  | 204.5 (M.score:204.5) | 6 | 9.7  | 0.41 | 223 |
| 65.3  | 5.8  | 2  | 203.7 (M.score:203.7) | 6 | 8.6  | 0.84 | 224 |
| 69.8  | 5.4  | 1  | 198.5 (M.score:198.5) | 6 | 11.3 | 0.47 | 234 |
| 82.2  | 4.3  | 1  | 198.1 (M.score:198.1) | 6 | 11.3 | 0.79 | 235 |
| 66.1  | 8.2  | 1  | 195.3 (M.score:195.3) | 6 | 12.5 | 0.66 | 237 |
| 29.6  | 9.8  | 1  | 194.7 (M.score:194.7) | 6 | 28.5 | 1.05 | 238 |
| 28.8  | 5.0  | 2  | 190.2 (M.score:190.2) | 6 | 24.6 | 0.57 | 250 |
| 67.2  | 7.2  | 1  | 187.0 (M.score:187.0) | 6 | 12.5 | 0.60 | 254 |
| 62.2  | 8.8  | 1  | 176.4 (M.score:176.4) | 6 | 12.8 | 0.89 | 266 |
| 28.2  | 4.8  | 2  | 164.6 (M.score:164.6) | 6 | 24.9 | 1.23 | 283 |
| 61.1  | 5.6  | 3  | 159.1 (M.score:159.1) | 6 | 12.7 | 1.27 | 291 |
| 26.2  | 7.8  | 2  | 147.4 (M.score:147.4) | 6 | 23.4 | 0.84 | 310 |
| 31.7  | 8.4  | 2  | 136.2 (M.score:136.2) | 6 | 25.0 | 0.58 | 337 |
| 88.6  | 8.8  | 1  | 113.3 (M.score:113.3) | 6 | 9.5  | 0.99 | 389 |
| 25.2  | 9.4  | 1  | 339.4 (M.score:339.4) | 5 | 24.4 | 1.24 | 117 |
| 25.0  | 10.4 | 1  | 308.0 (M.score:308.0) | 5 | 29.0 | 1.57 | 128 |
| 11.4  | 11.5 | 3  | 303.6 (M.score:303.6) | 5 | 50.5 | 1.07 | 130 |
| 21.2  | 6.0  | 1  | 295.3 (M.score:295.3) | 5 | 38.4 | 1.21 | 136 |

|       |      |     |                       |   |      |      |     |
|-------|------|-----|-----------------------|---|------|------|-----|
| 21.5  | 6.9  | 1   | 294.7 (M.score:294.7) | 5 | 30.3 | 0.73 | 138 |
| 24.9  | 10.3 | 1   | 271.7 (M.score:271.7) | 5 | 30.0 | 1.78 | 150 |
| 52.0  | 6.6  | 3   | 268.8 (M.score:268.8) | 5 | 13.0 | 1.05 | 153 |
| 17.6  | 6.3  | 1   | 261.4 (M.score:261.4) | 5 | 30.4 | 1.68 | 161 |
| 39.5  | 6.2  | 1   | 258.2 (M.score:258.2) | 5 | 21.0 | 1.65 | 166 |
| 57.2  | 5.7  | 1   | 248.5 (M.score:248.5) | 5 | 10.4 | 1.01 | 174 |
| 64.2  | 5.5  | 1   | 245.0 (M.score:245.0) | 5 | 11.1 | 1.32 | 176 |
| 25.4  | 5.4  | 9   | 235.0 (M.score:235.0) | 5 | 20.9 | 1.28 | 182 |
| 29.9  | 10.3 | 5   | 234.4 (M.score:234.4) | 5 | 20.8 | 1.25 | 183 |
| 90.4  | 5.2  | 1   | 232.1 (M.score:232.1) | 5 | 6.9  | 0.46 | 185 |
| 29.5  | 8.5  | 1   | 227.5 (M.score:227.5) | 5 | 20.3 | 1.21 | 187 |
| 47.0  | 8.8  | 5   | 227.0 (M.score:227.0) | 5 | 13.2 | 0.89 | 189 |
| 82.1  | 5.2  | 1   | 219.7 (M.score:219.7) | 5 | 9.0  | 0.98 | 197 |
| 22.2  | 8.5  | 191 | 218.7 (M.score:218.7) | 5 | 30.1 | 2.11 | 199 |
| 44.6  | 5.5  | 1   | 218.3 (M.score:218.3) | 5 | 16.1 | 1.80 | 200 |
| 21.9  | 9.6  | 2   | 218.3 (M.score:218.3) | 5 | 30.9 | 1.37 | 201 |
| 17.2  | 6.2  | 13  | 217.2 (M.score:217.2) | 5 | 37.0 | 0.89 | 203 |
| 81.7  | 8.7  | 3   | 213.8 (M.score:213.8) | 5 | 8.2  | 0.86 | 209 |
| 23.9  | 7.6  | 7   | 211.1 (M.score:211.1) | 5 | 25.9 | 1.01 | 212 |
| 63.5  | 6.1  | 6   | 209.1 (M.score:209.1) | 5 | 12.4 | 1.71 | 215 |
| 44.7  | 8.2  | 2   | 204.5 (M.score:204.5) | 5 | 14.3 | 2.02 | 222 |
| 17.7  | 5.8  | 2   | 202.8 (M.score:202.8) | 5 | 23.4 | 0.79 | 227 |
| 22.0  | 9.6  | 2   | 202.1 (M.score:202.1) | 5 | 30.9 | 1.44 | 228 |
| 25.3  | 5.5  | 1   | 201.8 (M.score:201.8) | 5 | 23.3 | 0.74 | 230 |
| 24.3  | 5.5  | 12  | 200.4 (M.score:200.4) | 5 | 24.0 | 0.82 | 231 |
| 47.5  | 4.9  | 3   | 198.7 (M.score:198.7) | 5 | 15.6 | 1.68 | 233 |
| 25.1  | 8.8  | 1   | 197.9 (M.score:197.9) | 5 | 23.4 | 1.24 | 236 |
| 21.4  | 5.7  | 2   | 193.3 (M.score:193.3) | 5 | 24.2 | 1.05 | 242 |
| 51.2  | 7.0  | 1   | 192.7 (M.score:192.7) | 5 | 11.4 | 0.89 | 243 |
| 57.4  | 9.4  | 1   | 190.4 (M.score:190.4) | 5 | 15.6 | 1.96 | 246 |
| 24.9  | 9.0  | 1   | 190.2 (M.score:190.2) | 5 | 30.2 | 1.20 | 248 |
| 30.5  | 8.8  | 1   | 190.2 (M.score:190.2) | 5 | 24.9 | 2.38 | 249 |
| 22.4  | 5.1  | 6   | 190.1 (M.score:190.1) | 5 | 26.6 | 1.37 | 252 |
| 36.3  | 9.3  | 1   | 182.2 (M.score:182.2) | 5 | 20.0 | 1.67 | 259 |
| 29.2  | 8.7  | 1   | 181.6 (M.score:181.6) | 5 | 19.2 | 1.01 | 261 |
| 25.1  | 7.1  | 1   | 179.2 (M.score:179.2) | 5 | 28.3 | 1.47 | 262 |
| 137.1 | 6.6  | 2   | 177.4 (M.score:177.4) | 5 | 4.9  | 0.57 | 265 |
| 28.6  | 6.1  | 1   | 176.4 (M.score:176.4) | 5 | 20.2 | 1.10 | 267 |
| 64.6  | 5.9  | 2   | 175.4 (M.score:175.4) | 5 | 8.8  | 0.61 | 269 |
| 29.3  | 4.7  | 2   | 172.0 (M.score:172.0) | 5 | 17.3 | 1.58 | 273 |
| 108.9 | 5.2  | 1   | 171.9 (M.score:171.9) | 5 | 6.3  | 0.74 | 274 |
| 35.4  | 5.9  | 1   | 171.6 (M.score:171.6) | 5 | 17.5 | 1.31 | 275 |
| 63.3  | 7.1  | 2   | 170.9 (M.score:170.9) | 5 | 8.8  | 1.20 | 276 |
| 64.8  | 5.0  | 1   | 163.3 (M.score:163.3) | 5 | 11.4 | 1.25 | 286 |
| 89.2  | 7.3  | 2   | 162.9 (M.score:162.9) | 5 | 7.0  | 1.11 | 287 |
| 59.8  | 8.8  | 1   | 157.8 (M.score:157.8) | 5 | 13.4 | 0.88 | 294 |
| 29.5  | 5.8  | 3   | 156.9 (M.score:156.9) | 5 | 25.5 | 2.93 | 295 |
| 80.6  | 6.0  | 2   | 140.8 (M.score:140.8) | 5 | 9.9  | 0.71 | 321 |
| 30.5  | 9.6  | 1   | 140.4 (M.score:140.4) | 5 | 29.1 | 2.34 | 324 |



|       |      |   |                       |   |      |      |     |
|-------|------|---|-----------------------|---|------|------|-----|
| 101.7 | 5.8  | 1 | 140.2 (M.score:140.2) | 5 | 6.8  | 1.68 | 325 |
| 65.4  | 4.9  | 2 | 133.2 (M.score:133.2) | 5 | 12.8 | 1.41 | 346 |
| 105.8 | 5.7  | 1 | 130.2 (M.score:130.2) | 5 | 6.5  | 1.70 | 349 |
| 36.1  | 7.6  | 1 | 123.2 (M.score:123.2) | 5 | 19.9 | 0.86 | 364 |
| 48.6  | 8.5  | 1 | 115.3 (M.score:115.3) | 5 | 14.0 | 1.32 | 384 |
| 15.4  | 10.4 | 2 | 111.2 (M.score:111.2) | 5 | 33.8 | 1.10 | 396 |
| 26.1  | 4.7  | 1 | 260.1 (M.score:260.1) | 4 | 22.4 | 1.42 | 163 |
| 30.1  | 6.2  | 1 | 256.9 (M.score:256.9) | 4 | 19.2 | 1.34 | 168 |
| 17.5  | 5.3  | 1 | 237.9 (M.score:237.9) | 4 | 20.8 | 1.28 | 179 |
| 26.1  | 4.7  | 1 | 235.3 (M.score:235.3) | 4 | 22.4 | 1.41 | 181 |
| 25.0  | 8.9  | 2 | 230.7 (M.score:230.7) | 4 | 22.5 | 1.12 | 186 |
| 51.5  | 7.0  | 1 | 224.9 (M.score:224.9) | 4 | 13.2 | 2.01 | 192 |
| 19.6  | 6.3  | 1 | 221.6 (M.score:221.6) | 4 | 23.5 | 0.97 | 193 |
| 22.2  | 6.4  | 2 | 220.5 (M.score:220.5) | 4 | 22.6 | 1.01 | 196 |
| 20.8  | 9.9  | 2 | 219.3 (M.score:219.3) | 4 | 24.9 | 1.18 | 198 |
| 53.5  | 6.4  | 2 | 218.0 (M.score:218.0) | 4 | 13.2 | 1.70 | 202 |
| 110.8 | 6.0  | 1 | 215.7 (M.score:215.7) | 4 | 5.1  | 0.56 | 205 |
| 18.0  | 6.4  | 1 | 215.6 (M.score:215.6) | 4 | 33.1 | 1.47 | 206 |
| 17.3  | 5.6  | 2 | 214.4 (M.score:214.4) | 4 | 36.0 | 0.66 | 208 |
| 16.6  | 6.0  | 1 | 211.7 (M.score:211.7) | 4 | 30.6 | 1.29 | 211 |
| 60.7  | 7.0  | 1 | 207.3 (M.score:207.3) | 4 | 8.7  | 1.19 | 217 |
| 63.8  | 6.3  | 2 | 206.8 (M.score:206.8) | 4 | 6.2  | 0.79 | 218 |
| 17.3  | 6.8  | 2 | 205.5 (M.score:205.5) | 4 | 31.0 | 1.23 | 219 |
| 27.1  | 7.0  | 3 | 204.7 (M.score:204.7) | 4 | 17.7 | 1.26 | 221 |
| 38.3  | 5.9  | 1 | 203.2 (M.score:203.2) | 4 | 16.5 | 1.07 | 225 |
| 21.7  | 5.7  | 2 | 202.8 (M.score:202.8) | 4 | 31.0 | 0.68 | 226 |
| 16.3  | 10.7 | 1 | 193.7 (M.score:193.7) | 4 | 37.3 | 0.77 | 240 |
| 80.7  | 5.2  | 7 | 193.5 (M.score:193.5) | 4 | 6.4  | 0.98 | 241 |
| 16.3  | 10.7 | 1 | 192.2 (M.score:192.2) | 4 | 37.3 | 0.67 | 244 |
| 62.1  | 8.9  | 1 | 187.7 (M.score:187.7) | 4 | 8.1  | 1.26 | 253 |
| 23.1  | 5.1  | 1 | 186.9 (M.score:186.9) | 4 | 28.2 | 0.48 | 255 |
| 23.1  | 7.7  | 3 | 184.2 (M.score:184.2) | 4 | 18.8 | 1.41 | 258 |
| 62.5  | 9.0  | 2 | 181.8 (M.score:181.8) | 4 | 10.8 | 1.54 | 260 |
| 22.6  | 6.5  | 1 | 178.3 (M.score:178.3) | 4 | 24.5 | 1.40 | 264 |
| 37.5  | 9.0  | 3 | 176.4 (M.score:176.4) | 4 | 10.9 | 1.06 | 268 |
| 37.7  | 5.0  | 1 | 173.9 (M.score:173.9) | 4 | 15.7 | 1.13 | 271 |
| 25.8  | 7.6  | 1 | 172.5 (M.score:172.5) | 4 | 18.8 | 1.21 | 272 |
| 24.5  | 4.6  | 1 | 170.6 (M.score:170.6) | 4 | 26.0 | 2.83 | 277 |
| 30.6  | 10.3 | 2 | 166.3 (M.score:166.3) | 4 | 17.5 | 1.73 | 279 |
| 42.8  | 5.4  | 1 | 165.7 (M.score:165.7) | 4 | 11.3 | 0.60 | 280 |
| 25.0  | 10.4 | 1 | 165.4 (M.score:165.4) | 4 | 23.1 | 2.04 | 281 |
| 23.6  | 11.2 | 2 | 163.3 (M.score:163.3) | 4 | 17.5 | 0.70 | 285 |
| 22.0  | 6.9  | 4 | 162.5 (M.score:162.5) | 4 | 26.4 | 1.01 | 288 |
| 30.1  | 8.8  | 2 | 161.8 (M.score:161.8) | 4 | 14.7 | 0.75 | 289 |
| 24.6  | 5.9  | 1 | 159.1 (M.score:159.1) | 4 | 26.5 | 1.03 | 292 |
| 60.9  | 6.1  | 1 | 156.7 (M.score:156.7) | 4 | 10.1 | 1.88 | 296 |
| 17.5  | 10.6 | 3 | 153.6 (M.score:153.6) | 4 | 19.1 | 1.07 | 302 |
| 20.7  | 10.8 | 1 | 151.5 (M.score:151.5) | 4 | 24.6 | 1.63 | 303 |
| 98.2  | 5.1  | 1 | 149.8 (M.score:149.8) | 4 | 5.0  | 3.08 | 306 |

|       |      |   |                       |   |      |      |     |
|-------|------|---|-----------------------|---|------|------|-----|
| 29.5  | 8.7  | 1 | 148.7 (M.score:148.7) | 4 | 21.7 | 1.76 | 309 |
| 60.1  | 6.5  | 1 | 145.7 (M.score:145.7) | 4 | 9.0  | 0.77 | 312 |
| 18.8  | 6.6  | 2 | 145.7 (M.score:145.7) | 4 | 19.5 | 0.35 | 313 |
| 21.4  | 10.2 | 3 | 144.2 (M.score:144.2) | 4 | 26.4 | 1.28 | 316 |
| 168.4 | 6.4  | 4 | 141.2 (M.score:141.2) | 4 | 3.1  | 1.16 | 320 |
| 44.1  | 5.2  | 1 | 140.5 (M.score:140.5) | 4 | 9.8  | 1.51 | 322 |
| 23.1  | 6.9  | 3 | 140.5 (M.score:140.5) | 4 | 24.6 | 1.81 | 323 |
| 77.0  | 6.9  | 1 | 138.8 (M.score:138.8) | 4 | 7.9  | 0.90 | 328 |
| 17.8  | 8.8  | 4 | 138.5 (M.score:138.5) | 4 | 33.7 | 1.15 | 330 |
| 23.6  | 10.3 | 2 | 137.1 (M.score:137.1) | 4 | 26.2 | 0.86 | 334 |
| 24.9  | 7.7  | 1 | 136.5 (M.score:136.5) | 4 | 14.7 | 0.77 | 335 |
| 60.7  | 5.7  | 1 | 136.2 (M.score:136.2) | 4 | 7.9  | 1.54 | 336 |
| 21.4  | 10.3 | 1 | 130.5 (M.score:130.5) | 4 | 26.4 | 1.26 | 348 |
| 73.2  | 8.4  | 5 | 128.8 (M.score:128.8) | 4 | 6.8  | 2.29 | 351 |
| 43.0  | 8.9  | 1 | 127.1 (M.score:127.1) | 4 | 15.4 | 1.04 | 355 |
| 64.8  | 4.7  | 1 | 126.8 (M.score:126.8) | 4 | 12.9 | 1.03 | 356 |
| 26.5  | 9.6  | 1 | 126.7 (M.score:126.7) | 4 | 15.9 | 1.56 | 357 |
| 16.7  | 10.4 | 3 | 126.6 (M.score:126.6) | 4 | 27.2 | 1.03 | 358 |
| 109.6 | 5.5  | 1 | 121.8 (M.score:121.8) | 4 | 6.1  | 0.47 | 368 |
| 19.8  | 5.3  | 2 | 121.2 (M.score:121.2) | 4 | 28.0 | 1.49 | 371 |
| 40.1  | 5.8  | 3 | 120.9 (M.score:120.9) | 4 | 12.5 | 1.80 | 373 |
| 59.2  | 6.0  | 1 | 120.1 (M.score:120.1) | 4 | 10.0 | 0.98 | 374 |
| 37.5  | 4.7  | 1 | 117.6 (M.score:117.6) | 4 | 14.2 | 1.32 | 378 |
| 46.6  | 5.6  | 2 | 116.9 (M.score:116.9) | 4 | 11.1 | 0.70 | 379 |
| 23.5  | 10.6 | 3 | 116.8 (M.score:116.8) | 4 | 17.0 | 0.48 | 380 |
| 25.7  | 5.4  | 2 | 115.2 (M.score:115.2) | 4 | 18.3 | 1.40 | 385 |
| 60.6  | 5.8  | 1 | 112.5 (M.score:112.5) | 4 | 8.1  | 0.88 | 392 |
| 42.4  | 8.1  | 3 | 111.9 (M.score:111.9) | 4 | 10.7 | 0.36 | 395 |
| 59.2  | 6.0  | 1 | 110.1 (M.score:110.1) | 4 | 9.7  | 1.45 | 398 |
| 58.5  | 6.4  | 1 | 105.5 (M.score:105.5) | 4 | 7.6  | 1.64 | 404 |
| 32.2  | 4.9  | 2 | 105.3 (M.score:105.3) | 4 | 16.2 | 1.45 | 405 |
| 104.5 | 4.9  | 2 | 97.3 (M.score:97.3)   | 4 | 4.3  | 0.99 | 433 |
| 56.4  | 6.5  | 1 | 97.0 (M.score:97.0)   | 4 | 8.0  | 0.73 | 435 |
| 12.5  | 6.8  | 2 | 95.9 (M.score:95.9)   | 4 | 30.6 | 0.86 | 443 |
| 16.1  | 10.2 | 1 | 94.1 (M.score:94.1)   | 4 | 24.5 | 2.07 | 451 |
| 26.1  | 9.3  | 1 | 85.8 (M.score:85.8)   | 4 | 16.4 | 2.00 | 476 |
| 37.3  | 5.7  | 2 | 85.7 (M.score:85.7)   | 4 | 14.4 | 0.70 | 478 |
| 5.3   | 8.8  | 3 | 247.0 (M.score:247.0) | 3 | 50.0 | 1.08 | 175 |
| 38.9  | 8.6  | 1 | 233.2 (M.score:233.2) | 3 | 8.4  | 0.54 | 184 |
| 95.7  | 6.1  | 1 | 220.8 (M.score:220.8) | 3 | 5.4  | 1.11 | 195 |
| 25.1  | 10.3 | 1 | 209.8 (M.score:209.8) | 3 | 18.9 | 2.30 | 214 |
| 28.3  | 10.6 | 1 | 201.8 (M.score:201.8) | 3 | 15.7 | 2.03 | 229 |
| 18.4  | 5.3  | 1 | 199.4 (M.score:199.4) | 3 | 19.2 | 1.16 | 232 |
| 21.1  | 6.1  | 3 | 193.9 (M.score:193.9) | 3 | 23.9 | 0.84 | 239 |
| 60.6  | 6.5  | 2 | 191.7 (M.score:191.7) | 3 | 8.0  | 0.57 | 245 |
| 62.2  | 6.1  | 2 | 190.1 (M.score:190.1) | 3 | 7.7  | 1.15 | 251 |
| 28.3  | 10.7 | 2 | 174.4 (M.score:174.4) | 3 | 15.7 | 1.92 | 270 |
| 15.3  | 10.5 | 4 | 168.7 (M.score:168.7) | 3 | 41.8 | 1.73 | 278 |
| 16.7  | 10.8 | 3 | 165.0 (M.score:165.0) | 3 | 23.3 | 0.37 | 282 |

|       |      |   |                       |   |      |      |     |
|-------|------|---|-----------------------|---|------|------|-----|
| 18.9  | 4.6  | 3 | 164.3 (M.score:164.3) | 3 | 22.6 | 1.35 | 284 |
| 34.4  | 9.4  | 2 | 160.5 (M.score:160.5) | 3 | 16.3 | 1.01 | 290 |
| 73.7  | 6.5  | 1 | 156.2 (M.score:156.2) | 3 | 7.0  | 1.23 | 297 |
| 21.6  | 5.8  | 1 | 156.1 (M.score:156.1) | 3 | 15.8 | 0.78 | 298 |
| 51.1  | 9.1  | 1 | 154.7 (M.score:154.7) | 3 | 9.4  | 1.85 | 299 |
| 64.0  | 8.9  | 2 | 153.9 (M.score:153.9) | 3 | 6.3  | 1.03 | 300 |
| 24.1  | 5.7  | 2 | 153.9 (M.score:153.9) | 3 | 16.1 | 0.64 | 301 |
| 42.7  | 4.4  | 1 | 150.9 (M.score:150.9) | 3 | 9.4  | 0.87 | 304 |
| 49.4  | 5.7  | 1 | 150.7 (M.score:150.7) | 3 | 7.8  | 1.10 | 305 |
| 34.5  | 9.5  | 1 | 149.8 (M.score:149.8) | 3 | 15.0 | 1.47 | 307 |
| 40.6  | 6.8  | 2 | 148.9 (M.score:148.9) | 3 | 9.5  | 0.94 | 308 |
| 58.6  | 6.8  | 1 | 146.3 (M.score:146.3) | 3 | 8.6  | 0.79 | 311 |
| 24.7  | 11.5 | 2 | 145.1 (M.score:145.1) | 3 | 12.2 | 1.18 | 314 |
| 25.1  | 6.4  | 2 | 144.4 (M.score:144.4) | 3 | 14.5 | 0.89 | 315 |
| 28.2  | 5.8  | 2 | 143.6 (M.score:143.6) | 3 | 18.7 | 1.34 | 317 |
| 43.0  | 5.6  | 1 | 139.4 (M.score:139.4) | 3 | 11.6 | 1.26 | 326 |
| 25.7  | 6.1  | 5 | 138.5 (M.score:138.5) | 3 | 19.7 | 1.94 | 329 |
| 23.6  | 9.5  | 2 | 137.8 (M.score:137.8) | 3 | 14.2 | 0.81 | 331 |
| 134.6 | 5.7  | 1 | 137.5 (M.score:137.5) | 3 | 3.2  | 1.69 | 332 |
| 15.4  | 10.5 | 3 | 137.2 (M.score:137.2) | 3 | 42.1 | 1.28 | 333 |
| 23.9  | 8.3  | 1 | 135.9 (M.score:135.9) | 3 | 14.4 | 0.48 | 338 |
| 14.9  | 10.8 | 2 | 134.9 (M.score:134.9) | 3 | 43.3 | 1.69 | 340 |
| 66.1  | 8.4  | 1 | 134.7 (M.score:134.7) | 3 | 5.8  | 1.95 | 341 |
| 43.2  | 9.8  | 2 | 134.3 (M.score:134.3) | 3 | 11.9 | 1.31 | 342 |
| 61.7  | 6.0  | 2 | 133.2 (M.score:133.2) | 3 | 9.7  | 0.80 | 345 |
| 29.5  | 5.6  | 1 | 131.2 (M.score:131.2) | 3 | 13.4 | 0.67 | 347 |
| 29.9  | 10.5 | 1 | 128.6 (M.score:128.6) | 3 | 18.7 | 1.43 | 352 |
| 82.3  | 6.8  | 1 | 127.7 (M.score:127.7) | 3 | 4.2  | 1.32 | 354 |
| 26.0  | 10.4 | 4 | 126.4 (M.score:126.4) | 3 | 13.5 | 0.80 | 359 |
| 33.3  | 9.2  | 1 | 124.5 (M.score:124.5) | 3 | 12.7 | 1.44 | 360 |
| 31.7  | 9.5  | 2 | 124.2 (M.score:124.2) | 3 | 9.8  | 0.74 | 361 |
| 103.5 | 4.8  | 1 | 123.7 (M.score:123.7) | 3 | 3.5  | 0.79 | 362 |
| 32.7  | 6.3  | 1 | 123.4 (M.score:123.4) | 3 | 14.9 | 1.93 | 363 |
| 34.0  | 6.6  | 1 | 122.3 (M.score:122.3) | 3 | 14.7 | 2.06 | 366 |
| 14.9  | 9.0  | 1 | 122.2 (M.score:122.2) | 3 | 38.9 | 1.08 | 367 |
| 28.9  | 5.6  | 1 | 121.1 (M.score:121.1) | 3 | 16.4 | 0.79 | 372 |
| 44.3  | 5.2  | 1 | 119.4 (M.score:119.4) | 3 | 8.4  | 1.64 | 375 |
| 21.6  | 9.0  | 1 | 119.4 (M.score:119.4) | 3 | 18.5 | 1.08 | 376 |
| 27.6  | 7.0  | 1 | 117.6 (M.score:117.6) | 3 | 19.6 | 1.33 | 377 |
| 27.6  | 5.6  | 2 | 116.1 (M.score:116.1) | 3 | 11.6 | 1.58 | 381 |
| 55.5  | 6.1  | 1 | 115.9 (M.score:115.9) | 3 | 7.8  | 1.38 | 382 |
| 14.5  | 10.2 | 2 | 115.1 (M.score:115.1) | 3 | 35.6 | 1.83 | 386 |
| 13.9  | 10.5 | 3 | 114.9 (M.score:114.9) | 3 | 28.3 | 1.10 | 387 |
| 32.6  | 7.5  | 1 | 114.8 (M.score:114.8) | 3 | 10.5 | 0.81 | 388 |
| 33.6  | 5.4  | 1 | 113.2 (M.score:113.2) | 3 | 14.2 | 1.93 | 391 |
| 36.0  | 7.2  | 1 | 111.1 (M.score:111.1) | 3 | 14.3 | 2.19 | 397 |
| 47.0  | 5.6  | 1 | 108.2 (M.score:108.2) | 3 | 9.7  | 0.32 | 402 |
| 13.1  | 9.7  | 2 | 104.6 (M.score:104.6) | 3 | 26.5 | 1.54 | 406 |
| 74.9  | 5.2  | 1 | 102.5 (M.score:102.5) | 3 | 5.4  | 1.81 | 411 |

|       |      |   |                       |   |      |      |     |
|-------|------|---|-----------------------|---|------|------|-----|
| 66.2  | 7.6  | 2 | 101.7 (M.score:101.7) | 3 | 5.6  | 1.38 | 414 |
| 74.2  | 6.1  | 4 | 101.5 (M.score:101.5) | 3 | 5.3  | 0.98 | 415 |
| 92.1  | 5.4  | 2 | 101.4 (M.score:101.4) | 3 | 5.6  | 1.33 | 416 |
| 76.0  | 5.8  | 1 | 101.2 (M.score:101.2) | 3 | 6.2  | 2.93 | 418 |
| 102.2 | 5.9  | 4 | 101.0 (M.score:101.0) | 3 | 4.6  | 1.22 | 419 |
| 66.3  | 6.3  | 4 | 99.3 (M.score:99.3)   | 3 | 8.1  | 0.60 | 422 |
| 34.5  | 9.1  | 1 | 98.0 (M.score:98.0)   | 3 | 9.4  | 1.61 | 428 |
| 56.7  | 5.9  | 2 | 97.8 (M.score:97.8)   | 3 | 5.6  | 0.58 | 430 |
| 113.7 | 8.6  | 1 | 97.6 (M.score:97.6)   | 3 | 4.1  | 0.91 | 431 |
| 15.2  | 11.3 | 4 | 97.0 (M.score:97.0)   | 3 | 16.9 | 0.79 | 434 |
| 24.1  | 11.4 | 3 | 96.6 (M.score:96.6)   | 3 | 13.7 | 0.93 | 437 |
| 121.5 | 5.2  | 1 | 96.6 (M.score:96.6)   | 3 | 3.7  | 2.16 | 438 |
| 13.6  | 8.5  | 1 | 96.1 (M.score:96.1)   | 3 | 31.3 | 1.00 | 441 |
| 58.0  | 6.7  | 1 | 95.9 (M.score:95.9)   | 3 | 6.3  | 1.53 | 442 |
| 15.6  | 10.5 | 1 | 95.3 (M.score:95.3)   | 3 | 22.2 | 0.78 | 444 |
| 25.1  | 7.7  | 1 | 95.2 (M.score:95.2)   | 3 | 10.3 | 0.46 | 445 |
| 58.7  | 5.1  | 1 | 95.0 (M.score:95.0)   | 3 | 6.4  | 0.85 | 447 |
| 38.4  | 9.2  | 3 | 94.6 (M.score:94.6)   | 3 | 12.6 | 1.34 | 448 |
| 23.3  | 5.4  | 1 | 92.9 (M.score:92.9)   | 3 | 16.7 | 1.17 | 452 |
| 26.8  | 6.7  | 2 | 91.3 (M.score:91.3)   | 3 | 10.8 | 1.06 | 456 |
| 19.1  | 4.6  | 2 | 91.3 (M.score:91.3)   | 3 | 26.4 | 1.09 | 457 |
| 43.4  | 5.0  | 1 | 90.9 (M.score:90.9)   | 3 | 7.1  | 1.41 | 458 |
| 49.0  | 6.5  | 2 | 90.6 (M.score:90.6)   | 3 | 8.2  | 1.17 | 459 |
| 78.6  | 6.2  | 2 | 90.3 (M.score:90.3)   | 3 | 3.9  | 2.05 | 460 |
| 45.8  | 6.7  | 1 | 88.7 (M.score:88.7)   | 3 | 7.5  | 1.85 | 464 |
| 39.9  | 8.6  | 1 | 87.7 (M.score:87.7)   | 3 | 10.4 | 0.80 | 466 |
| 26.1  | 6.3  | 5 | 86.7 (M.score:86.7)   | 3 | 12.7 | 0.89 | 471 |
| 25.2  | 5.2  | 1 | 86.6 (M.score:86.6)   | 3 | 15.3 | 3.17 | 472 |
| 99.2  | 4.8  | 1 | 86.1 (M.score:86.1)   | 3 | 3.8  | 1.19 | 474 |
| 23.3  | 7.7  | 1 | 86.1 (M.score:86.1)   | 3 | 19.0 | 1.65 | 475 |
| 45.5  | 4.8  | 2 | 85.3 (M.score:85.3)   | 3 | 10.6 | 1.05 | 479 |
| 31.3  | 5.7  | 3 | 83.2 (M.score:83.2)   | 3 | 9.5  | 2.69 | 487 |
| 82.2  | 8.2  | 8 | 82.3 (M.score:82.3)   | 3 | 4.5  | 0.64 | 491 |
| 16.0  | 10.1 | 1 | 81.7 (M.score:81.7)   | 3 | 16.8 | 0.82 | 492 |
| 29.9  | 10.7 | 1 | 80.1 (M.score:80.1)   | 3 | 7.3  | 0.34 | 496 |
| 15.4  | 10.3 | 2 | 78.1 (M.score:78.1)   | 3 | 21.6 | 0.59 | 506 |
| 36.9  | 7.6  | 1 | 75.5 (M.score:75.5)   | 3 | 8.8  | 1.96 | 516 |
| 28.8  | 10.5 | 1 | 75.0 (M.score:75.0)   | 3 | 11.1 | 2.44 | 519 |
| 15.6  | 10.3 | 1 | 73.0 (M.score:73.0)   | 3 | 22.2 | 1.05 | 525 |
| 107.5 | 6.8  | 2 | 71.3 (M.score:71.3)   | 3 | 2.7  | 0.78 | 534 |
| 60.4  | 9.0  | 1 | 71.0 (M.score:71.0)   | 3 | 6.3  | 2.41 | 535 |
| 44.4  | 6.6  | 1 | 70.7 (M.score:70.7)   | 3 | 10.9 | 1.08 | 537 |
| 51.8  | 5.8  | 2 | 70.1 (M.score:70.1)   | 3 | 6.7  | 0.38 | 541 |
| 58.8  | 6.3  | 1 | 69.9 (M.score:69.9)   | 3 | 5.4  | 1.26 | 543 |
| 29.4  | 7.8  | 1 | 67.8 (M.score:67.8)   | 3 | 11.2 | 2.48 | 547 |
| 50.9  | 6.1  | 2 | 67.2 (M.score:67.2)   | 3 | 9.2  | 1.25 | 552 |
| 24.4  | 7.6  | 1 | 66.0 (M.score:66.0)   | 3 | 16.2 | 1.95 | 556 |
| 177.0 | 6.1  | 1 | 65.8 (M.score:65.8)   | 3 | 3.2  | 2.03 | 559 |
| 50.4  | 7.7  | 1 | 63.4 (M.score:63.4)   | 3 | 6.6  | 2.00 | 568 |

|       |      |                         |   |      |      |     |
|-------|------|-------------------------|---|------|------|-----|
| 33.1  | 5.9  | 1 63.1 (M.score:63.1)   | 3 | 11.0 | 0.96 | 569 |
| 84.1  | 6.9  | 1 61.9 (M.score:61.9)   | 3 | 4.3  | 0.96 | 573 |
| 53.8  | 6.1  | 5 59.2 (M.score:59.2)   | 3 | 6.2  | 1.31 | 583 |
| 18.7  | 10.6 | 2 58.3 (M.score:58.3)   | 3 | 15.9 | 1.23 | 587 |
| 118.0 | 9.3  | 2 57.6 (M.score:57.6)   | 3 | 2.9  | 0.96 | 592 |
| 75.1  | 5.3  | 2 57.6 (M.score:57.6)   | 3 | 4.9  | 1.74 | 593 |
| 32.5  | 5.0  | 1 53.9 (M.score:53.9)   | 3 | 10.4 | 0.70 | 612 |
| 59.8  | 6.0  | 1 53.8 (M.score:53.8)   | 3 | 1.7  | 1.31 | 613 |
| 22.2  | 9.2  | 2 52.7 (M.score:52.7)   | 3 | 13.0 | 0.72 | 615 |
| 59.4  | 5.2  | 1 50.3 (M.score:50.3)   | 3 | 6.4  | 0.68 | 630 |
| 75.9  | 6.1  | 2 47.8 (M.score:47.8)   | 3 | 7.1  | 0.85 | 643 |
| 16.6  | 7.8  | 3 190.3 (M.score:190.3) | 2 | 28.5 | 0.88 | 247 |
| 28.7  | 8.9  | 1 185.8 (M.score:185.8) | 2 | 3.1  | 1.75 | 256 |
| 28.7  | 6.7  | 1 158.1 (M.score:158.1) | 2 | 13.3 | 0.92 | 293 |
| 27.5  | 5.5  | 1 142.4 (M.score:142.4) | 2 | 10.4 | 0.76 | 318 |
| 25.0  | 4.9  | 1 142.3 (M.score:142.3) | 2 | 20.5 | 0.77 | 319 |
| 14.0  | 9.5  | 3 139.0 (M.score:139.0) | 2 | 18.4 | 0.50 | 327 |
| 18.0  | 9.0  | 1 135.1 (M.score:135.1) | 2 | 17.6 | 2.46 | 339 |
| 90.7  | 5.5  | 2 133.9 (M.score:133.9) | 2 | 3.6  | 1.25 | 344 |
| 44.3  | 5.8  | 1 129.5 (M.score:129.5) | 2 | 7.0  | 2.07 | 350 |
| 34.3  | 8.3  | 1 128.1 (M.score:128.1) | 2 | 5.7  | 0.66 | 353 |
| 40.2  | 5.6  | 1 122.3 (M.score:122.3) | 2 | 7.2  | 1.04 | 365 |
| 47.6  | 5.6  | 2 121.8 (M.score:121.8) | 2 | 5.3  | 0.81 | 369 |
| 15.2  | 5.2  | 1 121.6 (M.score:121.6) | 2 | 27.5 | 1.67 | 370 |
| 45.3  | 5.5  | 1 115.5 (M.score:115.5) | 2 | 6.9  | 2.20 | 383 |
| 25.6  | 10.2 | 2 113.2 (M.score:113.2) | 2 | 9.6  | 0.65 | 390 |
| 18.8  | 8.3  | 2 112.3 (M.score:112.3) | 2 | 15.2 | 0.88 | 393 |
| 25.7  | 9.3  | 2 112.1 (M.score:112.1) | 2 | 10.0 | 1.24 | 394 |
| 45.6  | 4.9  | 1 109.6 (M.score:109.6) | 2 | 6.4  | 0.71 | 399 |
| 67.3  | 6.5  | 1 109.5 (M.score:109.5) | 2 | 4.1  | 0.97 | 400 |
| 42.7  | 9.1  | 1 107.2 (M.score:107.2) | 2 | 8.9  | 2.39 | 403 |
| 24.7  | 4.5  | 1 104.5 (M.score:104.5) | 2 | 14.5 | 0.89 | 407 |
| 15.7  | 11.5 | 3 104.1 (M.score:104.1) | 2 | 13.0 | 0.13 | 408 |
| 58.9  | 6.0  | 1 103.7 (M.score:103.7) | 2 | 4.1  | 1.46 | 409 |
| 30.7  | 5.2  | 1 102.6 (M.score:102.6) | 2 | 7.1  | 0.76 | 410 |
| 14.3  | 10.8 | 3 102.3 (M.score:102.3) | 2 | 16.3 | 0.98 | 412 |
| 14.6  | 10.9 | 2 102.2 (M.score:102.2) | 2 | 18.9 | 2.21 | 413 |
| 15.0  | 8.5  | 1 101.2 (M.score:101.2) | 2 | 17.8 | 0.45 | 417 |
| 54.0  | 5.3  | 1 99.9 (M.score:99.9)   | 2 | 5.8  | 0.74 | 420 |
| 72.2  | 6.7  | 1 99.4 (M.score:99.4)   | 2 | 4.4  | 1.25 | 421 |
| 18.1  | 6.7  | 1 99.0 (M.score:99.0)   | 2 | 17.2 | 0.99 | 423 |
| 17.3  | 10.4 | 1 98.7 (M.score:98.7)   | 2 | 19.2 | 1.46 | 424 |
| 38.0  | 8.5  | 1 98.6 (M.score:98.6)   | 2 | 6.2  | 0.25 | 425 |
| 25.4  | 10.1 | 1 98.2 (M.score:98.2)   | 2 | 9.6  | 0.80 | 426 |
| 32.8  | 9.0  | 2 98.0 (M.score:98.0)   | 2 | 7.8  | 0.63 | 427 |
| 15.6  | 7.6  | 1 97.9 (M.score:97.9)   | 2 | 19.9 | 1.40 | 429 |
| 66.2  | 5.9  | 2 97.4 (M.score:97.4)   | 2 | 4.6  | 1.37 | 432 |
| 15.9  | 9.2  | 1 96.9 (M.score:96.9)   | 2 | 16.3 | 0.71 | 436 |
| 15.7  | 7.0  | 4 96.4 (M.score:96.4)   | 2 | 17.4 | 1.53 | 439 |



|       |      |   |                     |   |      |      |     |
|-------|------|---|---------------------|---|------|------|-----|
| 11.3  | 7.7  | 2 | 96.4 (M.score:96.4) | 2 | 19.4 | 1.32 | 440 |
| 14.7  | 5.2  | 3 | 95.1 (M.score:95.1) | 2 | 26.3 | 1.29 | 446 |
| 45.8  | 6.2  | 1 | 94.5 (M.score:94.5) | 2 | 5.6  | 1.61 | 449 |
| 25.8  | 4.4  | 1 | 94.2 (M.score:94.2) | 2 | 12.5 | 1.15 | 450 |
| 20.9  | 5.8  | 1 | 92.6 (M.score:92.6) | 2 | 15.4 | 1.03 | 453 |
| 185.7 | 5.7  | 1 | 92.2 (M.score:92.2) | 2 | 1.2  | 0.75 | 455 |
| 30.5  | 9.3  | 1 | 90.3 (M.score:90.3) | 2 | 12.0 | 0.23 | 461 |
| 64.7  | 5.4  | 1 | 89.7 (M.score:89.7) | 2 | 4.0  | 0.68 | 462 |
| 15.4  | 11.2 | 2 | 89.5 (M.score:89.5) | 2 | 10.3 | 0.90 | 463 |
| 17.5  | 9.5  | 1 | 87.5 (M.score:87.5) | 2 | 12.9 | 0.94 | 467 |
| 34.7  | 6.2  | 1 | 87.4 (M.score:87.4) | 2 | 8.0  | 1.22 | 468 |
| 70.9  | 7.2  | 1 | 87.3 (M.score:87.3) | 2 | 3.1  | 1.19 | 469 |
| 56.9  | 5.7  | 1 | 87.0 (M.score:87.0) | 2 | 6.3  | 0.90 | 470 |
| 25.1  | 5.7  | 7 | 86.5 (M.score:86.5) | 2 | 18.1 | 2.08 | 473 |
| 63.5  | 5.2  | 2 | 85.8 (M.score:85.8) | 2 | 3.7  | 0.19 | 477 |
| 35.7  | 6.0  | 1 | 85.1 (M.score:85.1) | 2 | 5.9  | 0.27 | 480 |
| 48.9  | 5.4  | 4 | 84.7 (M.score:84.7) | 2 | 5.7  | 0.41 | 481 |
| 21.8  | 5.6  | 1 | 84.6 (M.score:84.6) | 2 | 16.2 | 0.69 | 482 |
| 42.4  | 5.3  | 1 | 84.2 (M.score:84.2) | 2 | 12.0 | 1.31 | 483 |
| 17.7  | 4.8  | 1 | 84.1 (M.score:84.1) | 2 | 31.7 | 0.65 | 484 |
| 83.1  | 5.6  | 1 | 83.6 (M.score:83.6) | 2 | 3.4  | 1.27 | 486 |
| 64.5  | 8.4  | 4 | 82.4 (M.score:82.4) | 2 | 4.3  | 1.39 | 490 |
| 17.6  | 10.5 | 2 | 81.2 (M.score:81.2) | 2 | 10.7 | 0.34 | 493 |
| 17.4  | 6.8  | 3 | 80.9 (M.score:80.9) | 2 | 18.5 | 1.46 | 494 |
| 39.2  | 8.2  | 2 | 80.2 (M.score:80.2) | 2 | 7.0  | 1.31 | 495 |
| 48.8  | 8.4  | 1 | 79.9 (M.score:79.9) | 2 | 7.3  | 2.99 | 497 |
| 44.5  | 8.6  | 1 | 79.8 (M.score:79.8) | 2 | 3.3  | 1.06 | 498 |
| 86.7  | 4.5  | 2 | 79.6 (M.score:79.6) | 2 | 3.6  | 2.08 | 499 |
| 28.2  | 10.8 | 1 | 79.5 (M.score:79.5) | 2 | 8.8  | 1.57 | 500 |
| 49.4  | 5.9  | 1 | 78.9 (M.score:78.9) | 2 | 5.4  | 0.33 | 502 |
| 40.7  | 4.9  | 1 | 78.8 (M.score:78.8) | 2 | 5.4  | 1.06 | 503 |
| 22.3  | 9.3  | 1 | 78.6 (M.score:78.6) | 2 | 18.3 | 0.36 | 504 |
| 29.0  | 8.8  | 1 | 78.2 (M.score:78.2) | 2 | 8.0  | 2.02 | 505 |
| 55.8  | 7.5  | 1 | 77.6 (M.score:77.6) | 2 | 3.4  | 0.27 | 507 |
| 16.8  | 6.3  | 2 | 77.2 (M.score:77.2) | 2 | 12.2 | 1.46 | 508 |
| 47.4  | 5.4  | 1 | 76.7 (M.score:76.7) | 2 | 5.6  | 0.74 | 509 |
| 29.7  | 7.8  | 1 | 76.4 (M.score:76.4) | 2 | 6.8  | 2.15 | 511 |
| 32.7  | 5.2  | 1 | 75.8 (M.score:75.8) | 2 | 7.5  | 0.60 | 512 |
| 98.1  | 5.1  | 1 | 75.8 (M.score:75.8) | 2 | 2.4  | 0.51 | 513 |
| 25.6  | 6.9  | 1 | 75.7 (M.score:75.7) | 2 | 8.7  | 1.73 | 514 |
| 15.4  | 10.6 | 3 | 75.5 (M.score:75.5) | 2 | 18.0 | 0.25 | 515 |
| 47.6  | 4.5  | 1 | 75.2 (M.score:75.2) | 2 | 4.3  | 0.53 | 517 |
| 69.2  | 5.3  | 2 | 75.2 (M.score:75.2) | 2 | 3.7  | 2.46 | 518 |
| 28.2  | 10.8 | 3 | 74.0 (M.score:74.0) | 2 | 6.9  | 0.50 | 521 |
| 10.7  | 6.4  | 3 | 73.2 (M.score:73.2) | 2 | 34.0 | 0.70 | 523 |
| 24.3  | 5.1  | 7 | 73.1 (M.score:73.1) | 2 | 8.8  | 0.55 | 524 |
| 24.6  | 8.4  | 4 | 72.3 (M.score:72.3) | 2 | 8.6  | 0.55 | 527 |
| 66.2  | 5.9  | 1 | 72.1 (M.score:72.1) | 2 | 5.6  | 1.24 | 528 |
| 22.2  | 4.7  | 2 | 72.0 (M.score:72.0) | 2 | 13.7 | 1.25 | 529 |

|       |      |   |                     |   |      |      |     |
|-------|------|---|---------------------|---|------|------|-----|
| 25.3  | 6.3  | 1 | 72.0 (M.score:72.0) | 2 | 11.6 | 1.62 | 530 |
| 44.8  | 10.0 | 1 | 71.9 (M.score:71.9) | 2 | 10.2 | 1.20 | 531 |
| 46.6  | 6.1  | 5 | 71.6 (M.score:71.6) | 2 | 6.4  | 1.51 | 532 |
| 86.2  | 5.4  | 2 | 70.6 (M.score:70.6) | 2 | 4.2  | 1.57 | 538 |
| 38.9  | 7.9  | 1 | 70.3 (M.score:70.3) | 2 | 9.3  | 1.18 | 539 |
| 38.1  | 6.1  | 2 | 70.0 (M.score:70.0) | 2 | 6.6  | 1.42 | 542 |
| 50.0  | 7.1  | 1 | 68.5 (M.score:68.5) | 2 | 5.1  | 1.85 | 544 |
| 34.6  | 6.8  | 1 | 68.4 (M.score:68.4) | 2 | 5.2  | 1.01 | 545 |
| 19.4  | 6.0  | 1 | 67.9 (M.score:67.9) | 2 | 13.6 | 1.11 | 546 |
| 43.2  | 5.5  | 3 | 67.7 (M.score:67.7) | 2 | 6.2  | 0.99 | 549 |
| 16.1  | 8.4  | 1 | 67.2 (M.score:67.2) | 2 | 16.0 | 1.59 | 551 |
| 26.2  | 5.6  | 2 | 66.8 (M.score:66.8) | 2 | 11.6 | 1.38 | 553 |
| 46.1  | 7.9  | 1 | 65.8 (M.score:65.8) | 2 | 4.4  | 0.51 | 557 |
| 59.9  | 9.3  | 1 | 65.8 (M.score:65.8) | 2 | 3.7  | 0.74 | 558 |
| 51.8  | 6.1  | 2 | 65.0 (M.score:65.0) | 2 | 5.7  | 2.04 | 561 |
| 83.8  | 7.9  | 1 | 64.9 (M.score:64.9) | 2 | 3.0  | 1.18 | 562 |
| 20.0  | 10.1 | 3 | 64.8 (M.score:64.8) | 2 | 10.9 | 2.30 | 563 |
| 35.9  | 6.7  | 5 | 64.4 (M.score:64.4) | 2 | 7.7  | 1.96 | 565 |
| 42.1  | 6.9  | 1 | 63.6 (M.score:63.6) | 2 | 5.5  | 0.53 | 566 |
| 18.2  | 9.7  | 1 | 63.5 (M.score:63.5) | 2 | 12.2 | 0.62 | 567 |
| 60.8  | 6.6  | 9 | 63.1 (M.score:63.1) | 2 | 3.4  | 0.92 | 570 |
| 28.5  | 10.1 | 1 | 62.5 (M.score:62.5) | 2 | 7.3  | 0.79 | 571 |
| 32.9  | 9.4  | 3 | 62.0 (M.score:62.0) | 2 | 5.5  | 1.66 | 572 |
| 30.3  | 8.4  | 2 | 61.5 (M.score:61.5) | 2 | 10.6 | 1.26 | 574 |
| 48.7  | 5.3  | 1 | 61.2 (M.score:61.2) | 2 | 5.6  | 1.39 | 575 |
| 29.3  | 8.9  | 1 | 60.2 (M.score:60.2) | 2 | 7.6  | 2.03 | 577 |
| 20.8  | 10.8 | 1 | 59.9 (M.score:59.9) | 2 | 11.2 | 1.26 | 580 |
| 24.3  | 4.9  | 3 | 59.5 (M.score:59.5) | 2 | 9.2  | 0.82 | 582 |
| 41.3  | 5.3  | 1 | 58.6 (M.score:58.6) | 2 | 5.5  | 0.80 | 584 |
| 42.3  | 5.8  | 1 | 58.2 (M.score:58.2) | 2 | 4.5  | 1.39 | 588 |
| 41.8  | 4.9  | 3 | 57.6 (M.score:57.6) | 2 | 8.4  | 0.90 | 591 |
| 111.5 | 5.7  | 1 | 56.9 (M.score:56.9) | 2 | 2.7  | 1.21 | 595 |
| 17.4  | 5.4  | 2 | 56.3 (M.score:56.3) | 2 | 16.9 | 0.89 | 598 |
| 17.3  | 5.7  | 7 | 56.3 (M.score:56.3) | 2 | 11.3 | 0.22 | 599 |
| 28.9  | 6.9  | 2 | 56.0 (M.score:56.0) | 2 | 7.5  | 1.65 | 601 |
| 65.9  | 8.2  | 1 | 55.9 (M.score:55.9) | 2 | 3.1  | 1.92 | 602 |
| 79.8  | 8.3  | 1 | 55.6 (M.score:55.6) | 2 | 3.4  | 1.11 | 603 |
| 19.8  | 9.8  | 2 | 55.3 (M.score:55.3) | 2 | 13.9 | 1.62 | 604 |
| 13.6  | 5.9  | 2 | 55.2 (M.score:55.2) | 2 | 14.6 | 1.62 | 606 |
| 37.4  | 7.6  | 1 | 54.9 (M.score:54.9) | 2 | 6.5  | 1.27 | 607 |
| 66.4  | 4.8  | 1 | 53.7 (M.score:53.7) | 2 | 4.5  | 1.62 | 614 |
| 15.3  | 3.5  | 1 | 52.6 (M.score:52.6) | 2 | 16.9 | 1.65 | 617 |
| 90.7  | 6.3  | 4 | 52.5 (M.score:52.5) | 2 | 3.0  | 0.48 | 618 |
| 35.7  | 6.5  | 2 | 52.3 (M.score:52.3) | 2 | 4.6  | 1.02 | 619 |
| 65.5  | 6.6  | 1 | 52.1 (M.score:52.1) | 2 | 3.7  | 0.67 | 620 |
| 101.6 | 6.0  | 1 | 51.9 (M.score:51.9) | 2 | 2.5  | 1.48 | 622 |
| 53.8  | 8.6  | 1 | 51.4 (M.score:51.4) | 2 | 3.5  | 2.28 | 623 |
| 36.2  | 5.8  | 4 | 51.3 (M.score:51.3) | 2 | 6.9  | 1.10 | 625 |
| 12.3  | 9.3  | 1 | 50.8 (M.score:50.8) | 2 | 32.5 | 0.24 | 628 |

|       |     |                       |   |      |      |     |
|-------|-----|-----------------------|---|------|------|-----|
| 57.0  | 7.2 | 2 50.2 (M.score:50.2) | 2 | 4.4  | 1.23 | 631 |
| 62.1  | 5.0 | 1 49.7 (M.score:49.7) | 2 | 3.5  | 1.19 | 633 |
| 17.4  | 5.2 | 1 49.5 (M.score:49.5) | 2 | 18.5 | 0.93 | 634 |
| 55.2  | 7.0 | 1 49.1 (M.score:49.1) | 2 | 5.7  | 1.09 | 637 |
| 71.5  | 5.3 | 2 47.9 (M.score:47.9) | 2 | 3.9  | 1.54 | 640 |
| 26.1  | 4.5 | 1 47.9 (M.score:47.9) | 2 | 12.4 | 1.22 | 641 |
| 69.9  | 5.8 | 1 47.5 (M.score:47.5) | 2 | 4.0  | 2.87 | 645 |
| 26.9  | 5.7 | 1 47.3 (M.score:47.3) | 2 | 8.0  | 4.76 | 647 |
| 65.7  | 5.3 | 1 45.9 (M.score:45.9) | 2 | 3.6  | 0.44 | 658 |
| 144.1 | 6.0 | 1 45.7 (M.score:45.7) | 2 | 2.2  | 0.23 | 660 |
| 25.9  | 8.9 | 1 45.5 (M.score:45.5) | 2 | 9.0  | 1.57 | 664 |
| 41.8  | 4.7 | 1 45.3 (M.score:45.3) | 2 | 7.4  | 1.47 | 666 |
| 64.7  | 7.5 | 2 44.4 (M.score:44.4) | 2 | 3.8  | 0.83 | 670 |
| 57.8  | 5.5 | 2 44.0 (M.score:44.0) | 2 | 4.9  | 0.84 | 672 |
| 70.1  | 5.8 | 1 42.8 (M.score:42.8) | 2 | 3.1  | 3.79 | 679 |
| 39.4  | 5.9 | 1 42.7 (M.score:42.7) | 2 | 9.7  | 1.45 | 680 |
| 91.3  | 6.8 | 1 42.6 (M.score:42.6) | 2 | 2.8  | 1.01 | 681 |
| 31.6  | 7.1 | 4 41.9 (M.score:41.9) | 2 | 7.7  | 3.25 | 686 |
| 29.4  | 7.7 | 1 41.6 (M.score:41.6) | 2 | 5.3  | 0.45 | 688 |
| 32.4  | 9.4 | 1 40.2 (M.score:40.2) | 2 | 5.2  | 0.63 | 694 |
| 103.9 | 5.6 | 2 39.7 (M.score:39.7) | 2 | 3.3  | 0.25 | 698 |
| 36.4  | 9.0 | 1 39.6 (M.score:39.6) | 2 | 9.2  | 2.12 | 699 |
| 29.5  | 5.7 | 1 39.6 (M.score:39.6) | 2 | 10.8 | 1.02 | 700 |
| 59.1  | 5.6 | 1 39.3 (M.score:39.3) | 2 | 3.7  | 0.30 | 703 |
| 31.9  | 5.2 | 1 39.0 (M.score:39.0) | 2 | 7.2  | 0.68 | 705 |
| 38.5  | 6.4 | 8 37.6 (M.score:37.6) | 2 | 6.4  | 1.13 | 715 |
| 22.1  | 9.8 | 2 36.4 (M.score:36.4) | 2 | 17.3 | 1.76 | 721 |
| 43.5  | 9.1 | 1 35.5 (M.score:35.5) | 2 | 6.0  | 3.32 | 727 |
| 68.6  | 5.9 | 1 34.9 (M.score:34.9) | 2 | 3.1  | 0.29 | 734 |
| 43.8  | 8.8 | 1 34.0 (M.score:34.0) | 2 | 7.5  | 1.24 | 741 |
| 59.5  | 6.2 | 1 33.5 (M.score:33.5) | 2 | 5.4  | 2.17 | 743 |
| 43.6  | 5.6 | 1 33.3 (M.score:33.3) | 2 | 6.8  | 0.86 | 746 |
| 69.0  | 7.3 | 1 31.0 (M.score:31.0) | 2 | 2.8  | 1.25 | 761 |
| 28.7  | 9.5 | 6 29.3 (M.score:29.3) | 2 | 6.1  | 0.04 | 775 |
| 20.2  | 5.3 | 1 29.2 (M.score:29.2) | 2 | 13.4 | 3.61 | 780 |
| 227.7 | 5.4 | 1 28.8 (M.score:28.8) | 2 | 0.8  | 0.43 | 782 |
| 57.7  | 5.1 | 1 28.4 (M.score:28.4) | 2 | 3.4  | 0.77 | 783 |
| 37.0  | 9.3 | 1 28.0 (M.score:28.0) | 2 | 4.1  | 5.73 | 787 |

\_\_\_\_\_

\_\_\_\_\_

\_\_\_\_\_

\_\_\_\_\_

\_\_\_\_\_

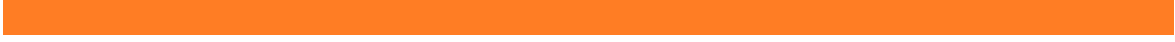

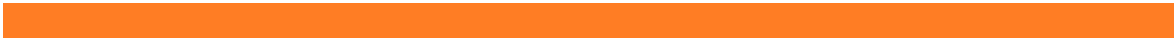



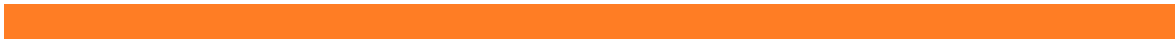

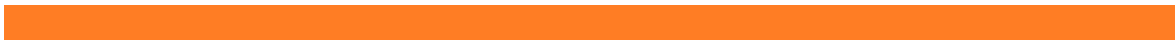











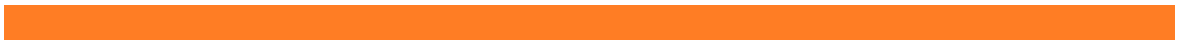







\_\_\_\_\_

\_\_\_\_\_

\_\_\_\_\_

\_\_\_\_\_

\_\_\_\_\_

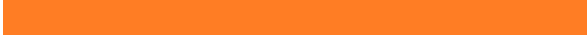



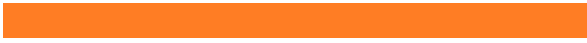

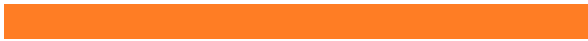

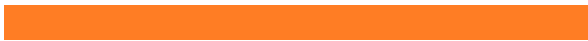













Supplement: s1 [file s1]
