# Supplementary material for: Identification of Tomato Infecting Viruses That Co-Isolate with Nanovesicles Using a Combined Proteomics and Electron-Microscopic Approach
Source: MDPI journal article supplement (doi:10.3390/nano11081922), 2021-07-26
Supplement: s1 [file s1]

## *Supplementary Materials*

# **Identification of Tomato Infecting Viruses That Co-Isolate with Nanovesicles Using a Combined Proteomics and Electron-Microscopic Approach**

**Ramila Mammadova**<sup>1</sup>, **Immacolata Fiume**<sup>1</sup>, **Ramesh Bokka**<sup>1</sup>, **Veronika Kralj-Iglic**<sup>2</sup>, **Darja Božič**<sup>2</sup>, **Matic Kisovec**<sup>3</sup>, **Marjetka Podobnik**<sup>3</sup>, **Apolonija Bedina Zavec**<sup>3</sup>, **Matej Hočevár**<sup>4</sup>, **Gabriella Gellén**<sup>5</sup>, **Gitta Schlosser**<sup>5</sup> and **Gabriella Pocsfalvi**<sup>1,\*</sup>

<sup>1</sup> Extracellular Vesicles and Mass Spectrometry Laboratory, Institute of Biosciences and BioResources, National Research Council of Italy, 80131 Naples, Italy; ramila.mammadova797@gmail.com (R.M.); immacolata.fiume@ibbr.cnr.it (I.F.); ramesh.chem2008@gmail.com (R.B.)

<sup>2</sup> Laboratory of Clinical Biophysics, Faculty of Health Sciences, University of Ljubljana, SI-1000 Ljubljana, Slovenia; veronika.kralj-iglic@fe.uni-lj.si (V.K.-I.); darja.bozic@fe.uni-lj.si (D.B.)

<sup>3</sup> Department of Molecular Biology and Nanobiotechnology, National Institute of Chemistry, SI-1000 Ljubljana, Slovenia; matic.kisovec@ki.si (M.K.); marjetka.podobnik@ki.si (M.P.); polona.bedina@ki.si (A.B.Z.)

<sup>4</sup> Institute of Metals and Technology, SI-1000 Ljubljana, Slovenia; matej.hocevar@imt.si

<sup>5</sup> MTA-ELTE Lendület Ion Mobility Mass Spectrometry Research Group, ELTE Eötvös Loránd University, Institute of Chemistry, H-1117 Budapest, Hungary; gabgellen@staff.elte.hu (G.G.); gitta.schlosser@ttk.elte.hu (G.S.)

\* Correspondence: gabriella.pocsfalvi@ibbr.cnr.it

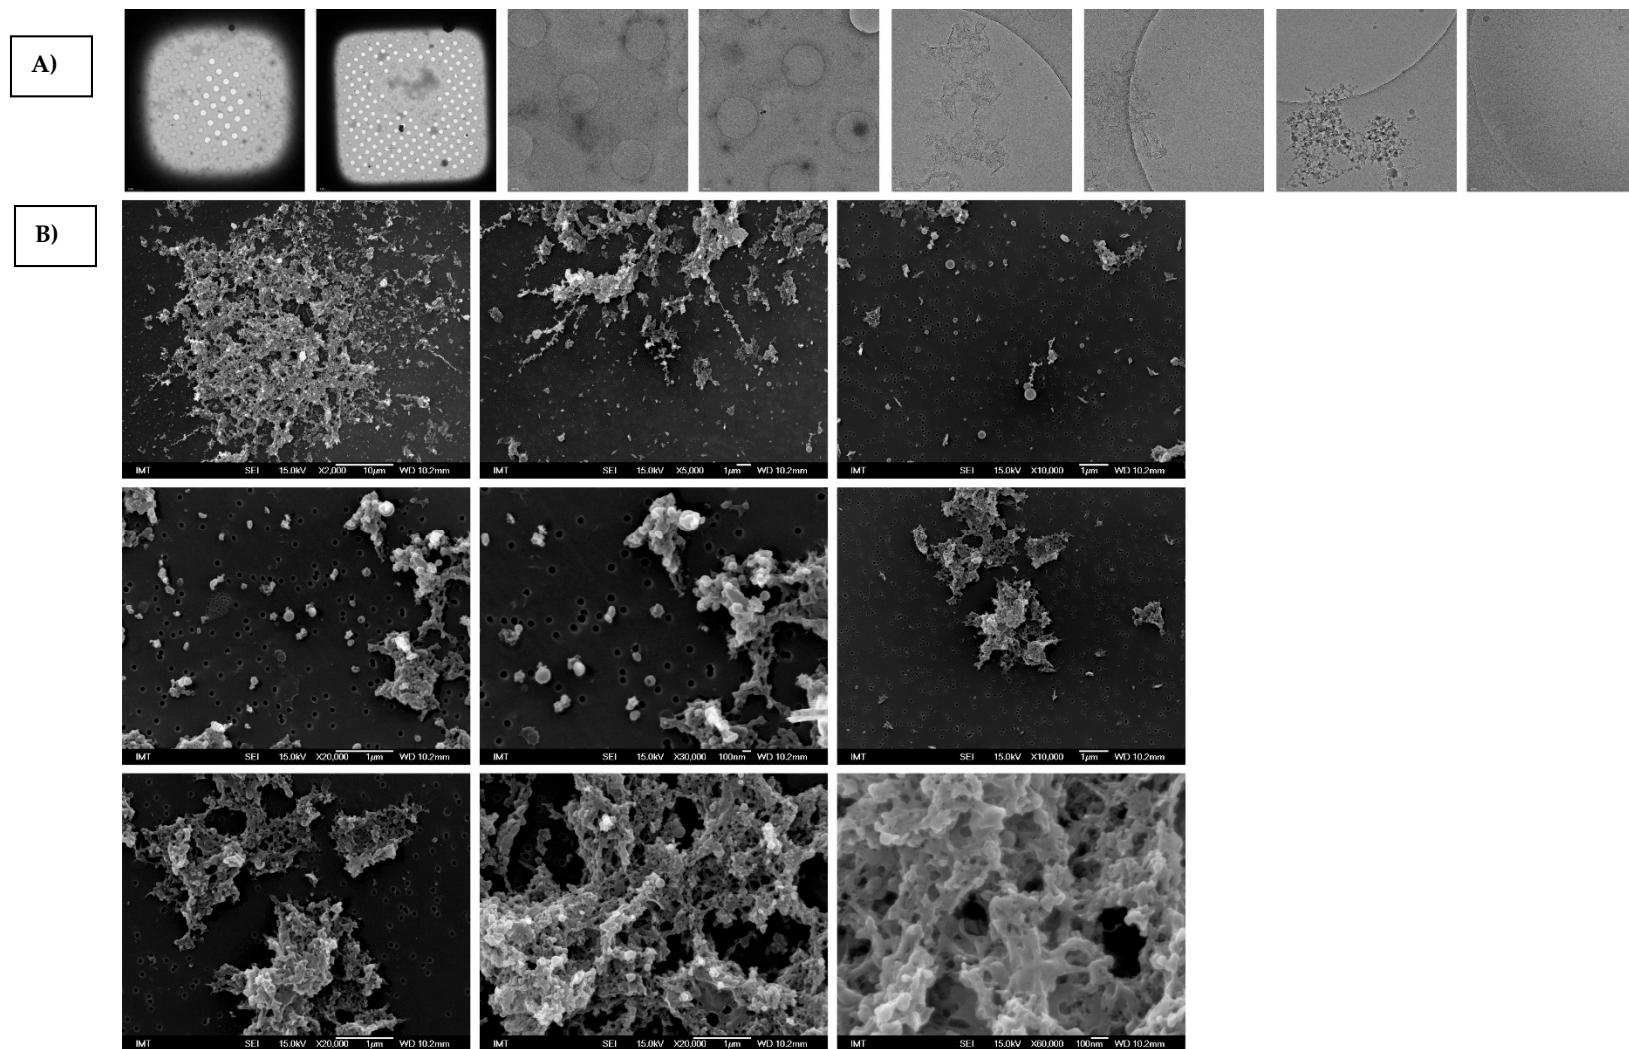

**Figure S1.** A) Cryo-TEM and B) SEM images of sucrose density separated nanovesicles in the low density visible fraction B1 isolated from tomatoes homogenate.

A)

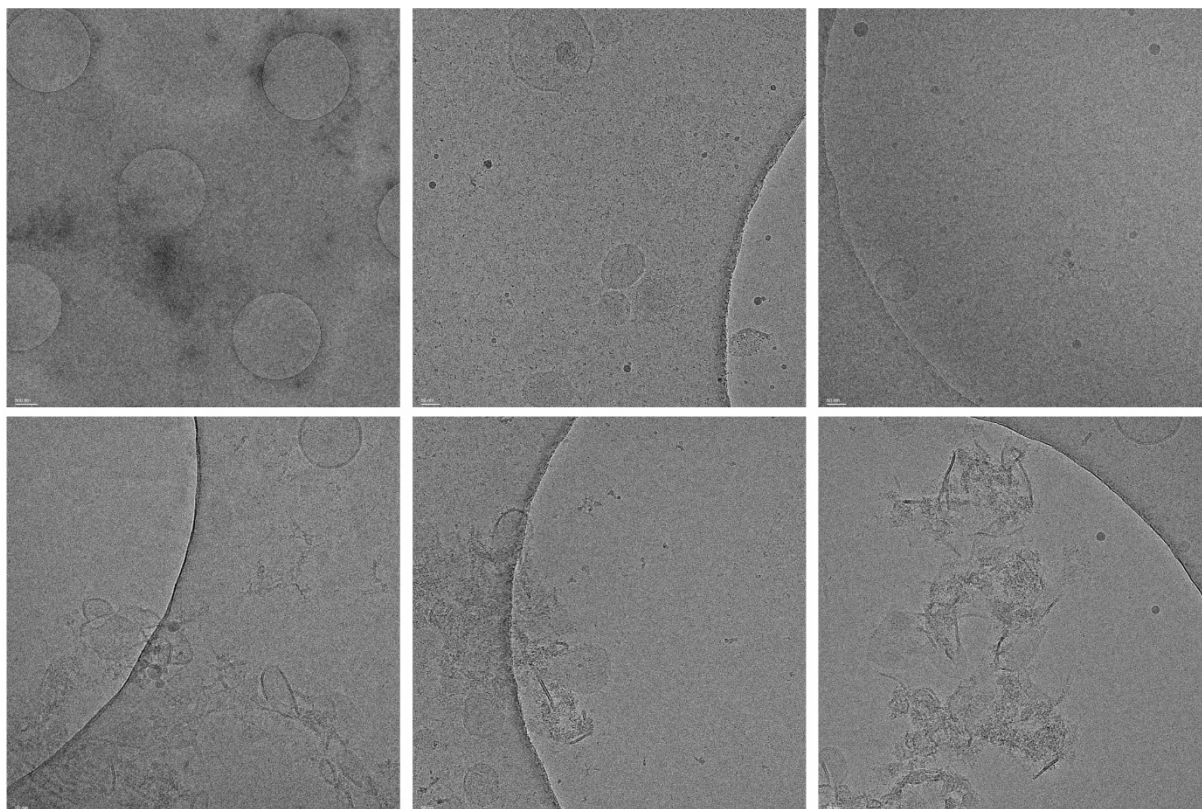

B)

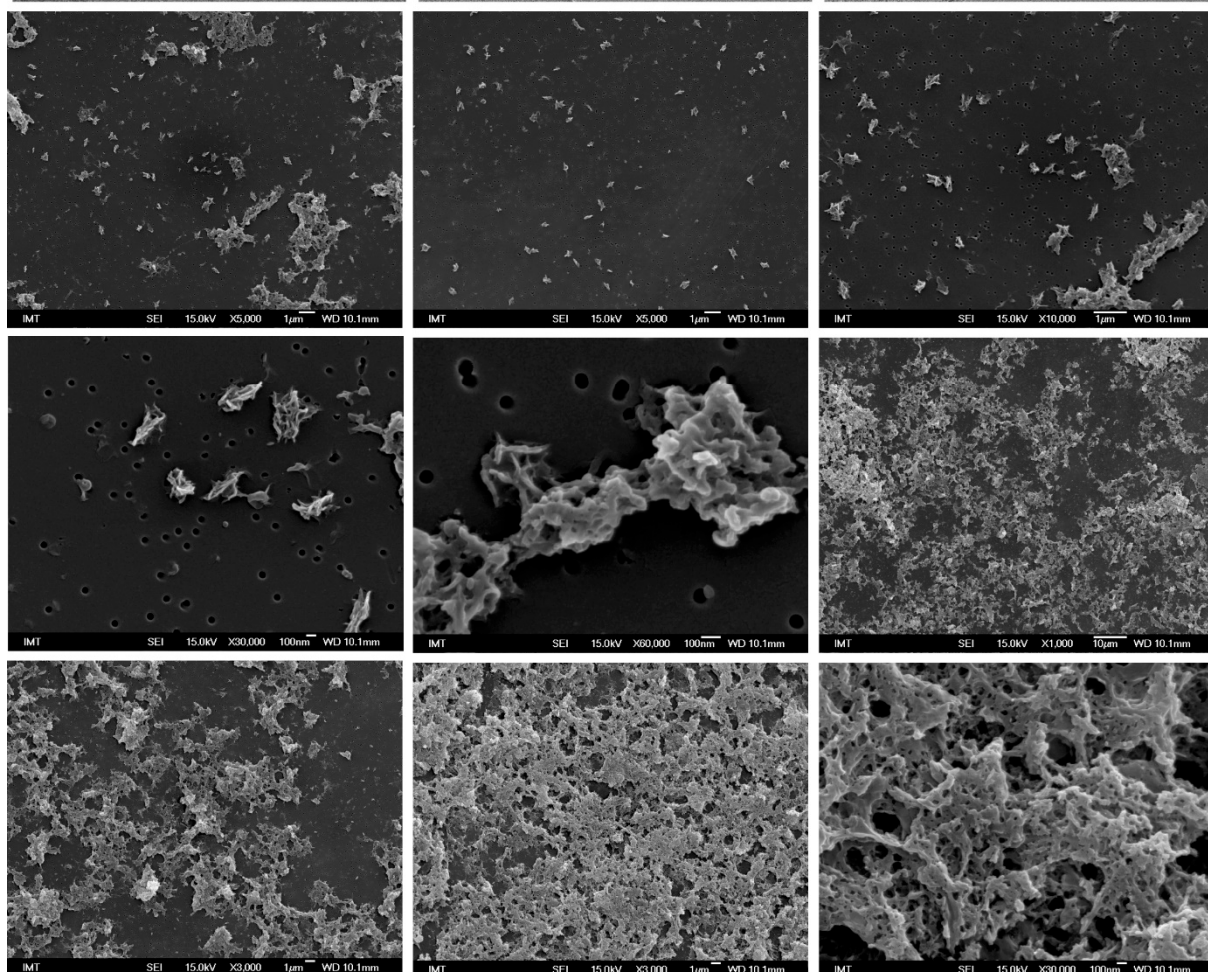

**Figure S2.** A) Cryo-TEM and B) SEM images of sucrose density separated nanovesicles in the high density visible fraction B2 isolated from tomatoes homogenate.

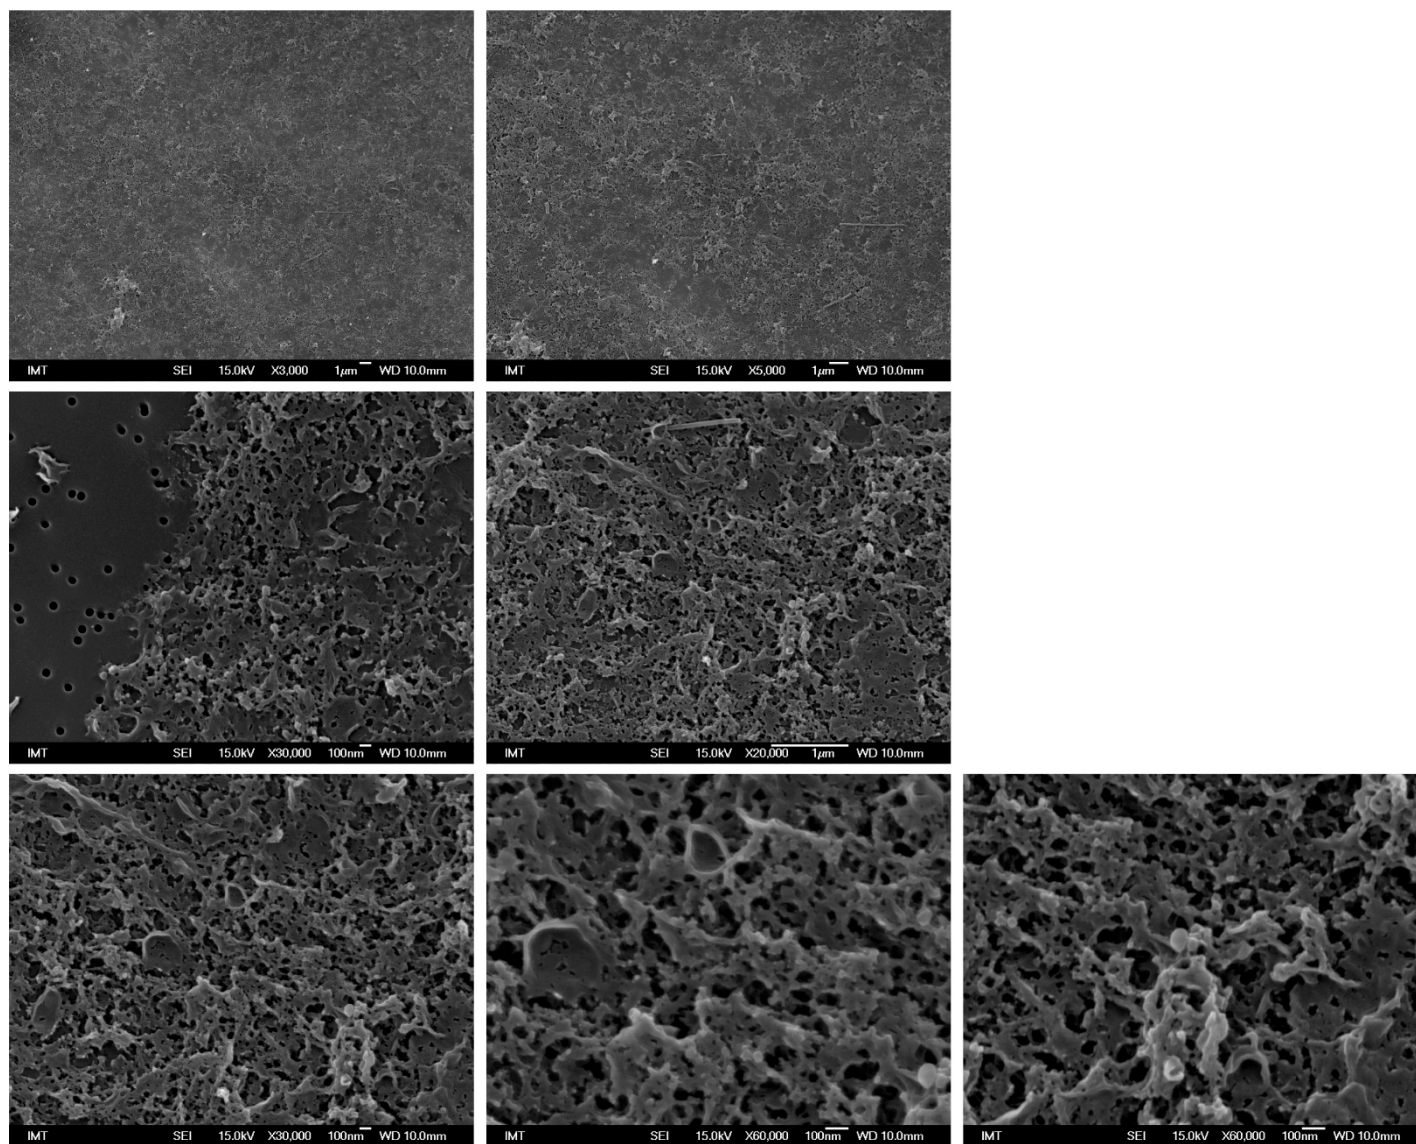

**Figure S3.** SEM images of the SEC fractions isolated from the tomato homogenate.

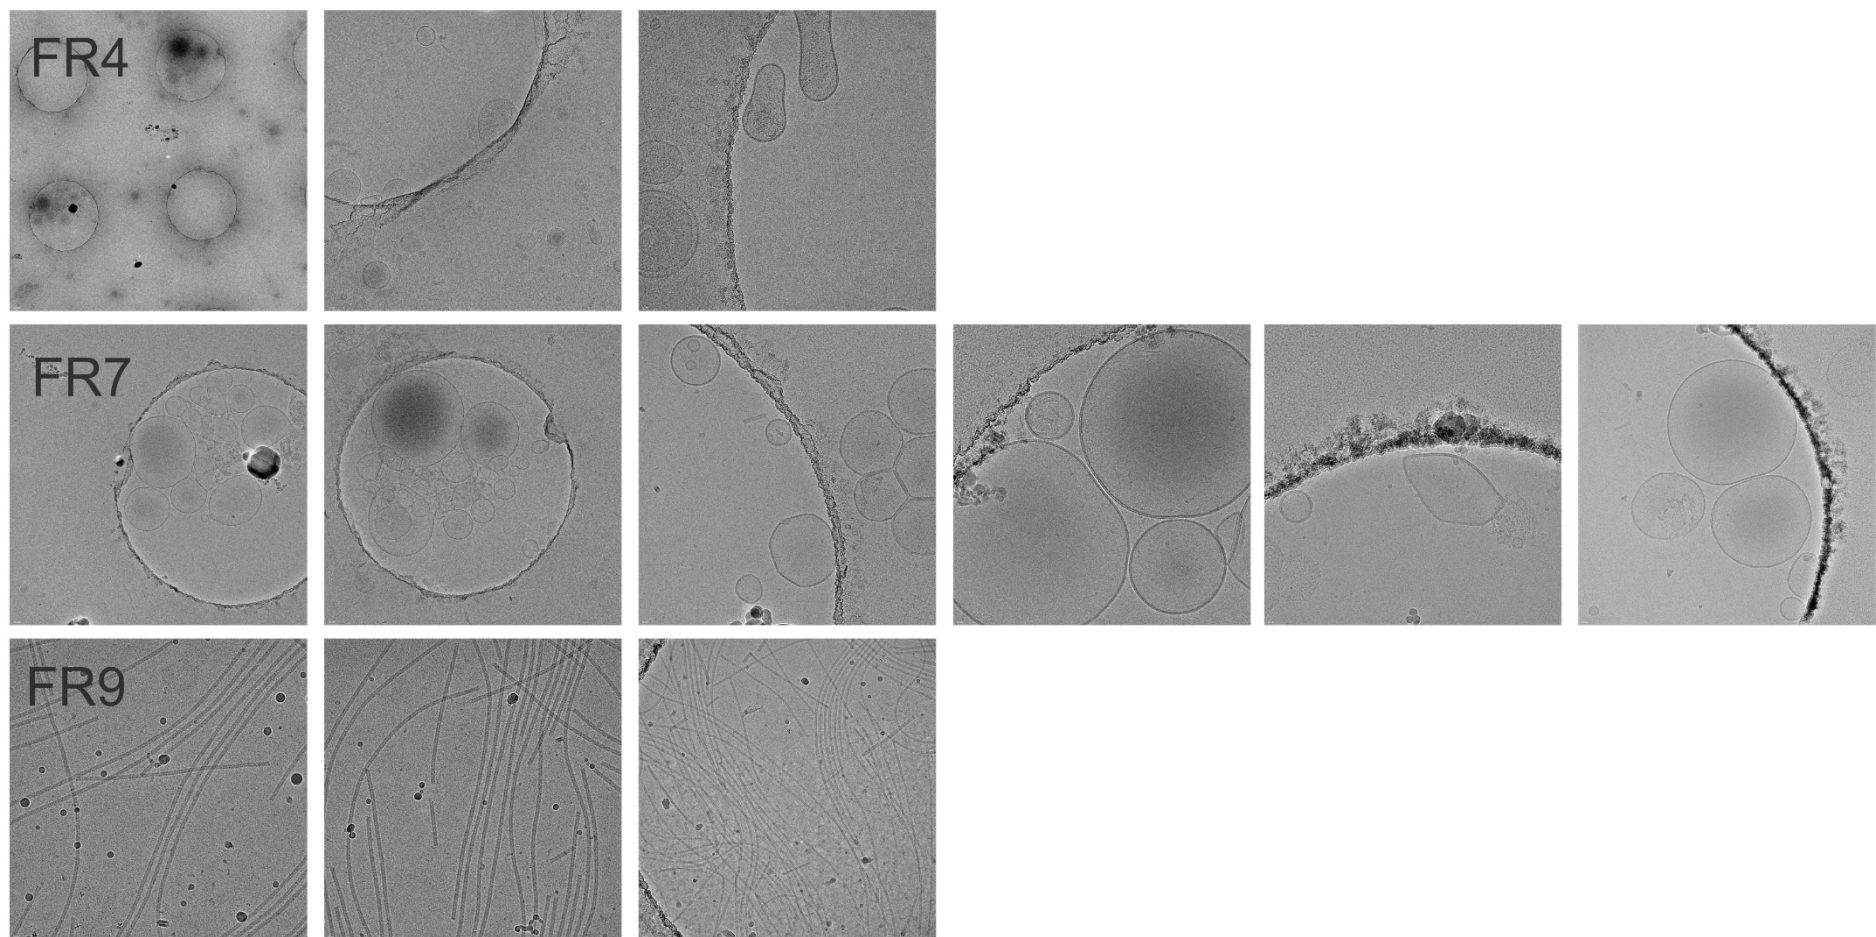

**Figure S4.** Cryo-TEM images of iodixanol density separated nanovesicles in three visible bands (Fraction 4, Fraction 7 and Fraction 9) isolated from the homogenate of tomato infected by the virus.
